# Supplementary material for: Development of Silicon Carbide-Supported Palladium Catalysts and Their Application as Semihydrogenation Catalysts for Alkynes under Batch- and Continuous-Flow Conditions
Source: MDPI journal article supplement (doi:10.3390/catal12101253), 2022-10-17

## Supplementary Materials

### **Development of Silicon Carbide-Supported Palladium Catalysts and Their Application as Semihydrogenation Catalysts for Alkynes under Batch- and Continuous-Flow Conditions**

Tsuyoshi Yamada,<sup>1,\*</sup> Haruka Yamamoto,<sup>1</sup> Kanon Kawai,<sup>1</sup> Kwihwan Park,<sup>1</sup> Norihiko Aono<sup>2</sup> and Hironao Sajiki<sup>1,\*</sup>

<sup>1</sup> Laboratory of Organic Chemistry, Gifu Pharmaceutical University, 1-25-4 Daigaku-nishi, Gifu 501-1196, Japan  
E-mail: yamada@gifu-pu.ac.jp, sajiki@gifu-pu.ac.jp

<sup>2</sup> Research and Development Function, ARK Creation Centre, Cataler Corporation, 1905-10 Shimonobe, Iwata 438-0112, Japan

#### **Contents**

- 1. General**
- 2. Preparation of 3% Pd/SiC catalyst (Scheme 3)**
- 3. Preparation of catalyst cartridge**
- 4. Preparation of 3% Pd(DETA)/SiC catalyst (Scheme 4)**
- 5. General procedure for the scope of the substrate under batch conditions**
- 6. General procedures for semihydrogenation of alkynes under batch and continuous-flow conditions**
- 7. Optimization of semihydrogenation under batch and continuous-flow conditions**
- 8. Reuse test of 3% Pd/SiC**
- 9. FIB-SEM image and EDX analysis of 3% Pd/SiC**
- 10. XPS data of 3% Pd/SiC**
- 11. Long-term continuous-flow semihydrogenation (Figure 3)**
- 12. Calculation of the residence time**
- 13. Spectroscopic data of products**
- 14. <sup>1</sup>H and <sup>13</sup>C spectra of products**

## 1. General

All reagents and solvents were obtained from commercial sources and used without further purification. Silicon carbide was obtained from Cataler Corporation (Shizuoka, Japan). Pd(OAc)<sub>2</sub> was obtained from N.E. Chemcat Corporation (Tokyo, Japan). The <sup>1</sup>H NMR and <sup>13</sup>C NMR spectra were recorded on JEOL JNM ECA-500 (500 MHz for <sup>1</sup>H NMR and 125 MHz for <sup>13</sup>C NMR) and ECZ-400 (400 MHz for <sup>1</sup>H NMR and 100 MHz for <sup>13</sup>C NMR) spectrometers. CDCl<sub>3</sub> was used as the solvent for the NMR measurements. The chemical shifts (δ) are expressed in parts per million and internally referenced (0.00 ppm for tetramethylsilane and 77.0 ppm for CDCl<sub>3</sub> for <sup>13</sup>C NMR). FlowFactory Flow reactor FFX-1000G (EYELA) was used for the continuous-flow hydrogenation reactions. Thermo Fisher Helios G4 PFIB UX, ULVAC-PHI QuanteraSXM, OXFORD X-MaxN 150, and Shimadzu AA-7000 instruments were used for focused ion beam scanning electron microscopy (FIB-SEM) analysis, X-ray photoelectron spectroscopy (XPS), energy dispersive X-ray spectrometry (EDX), and atomic absorption spectrometry (AAS), respectively. All of the <sup>1</sup>H NMR spectra of the known products were identical to those reported in the literature.

## 2. Preparation of 3% Pd/SiC catalyst (Scheme 3)

Cubic SiC (grayish color) was crushed to small particles by using a mortar and pestle, passed through a filter (diameter of the filter is < 63 μm), and deaerated in vacuo. A solution of Pd(OAc)<sub>2</sub> [39.1 mg, 174.1 μmol (18.5 mg, palladium quantity)] in MeOH (6.0 mL) was poured into SiC particles (600 mg) placed in a 50 mL-round-bottom flask, stirred under argon atmosphere at 25 °C for 24 h. The resulting dark gray solid was collected by filtration (1.0 μm filter paper), washed with H<sub>2</sub>O (10 mL × 3) and MeOH (10 mL × 3), and dried in vacuo for 24 h to give Pd/SiC (608.5 mg). The filtrate was transferred to a 100 mL volumetric flask and diluted to 100 mL with MeOH; 7.2 ppm (0.7 mg) of palladium species was observed in the diluted filtrate by using AAS (SHIMADZU AA-7000). The total palladium species that was not absorbed in SiC was 0.7 mg; thus, the palladium content of Pd/SiC was estimated to be approximately 3% [(18.5 – 0.7)/(600 + 18.5 – 0.7) × 100].

## 3. Preparation of catalyst cartridge

(1 and 1') Prepare column ends, (2) O-ring, (3) filter pressing ring, (4) distributor filter, (5) stainless filters, (6) Teflon filters, and (7) stainless column pipe.

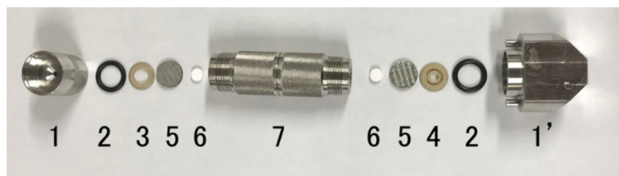

2) Insert the Teflon filter inside the stainless column pipe. Put stainless filter, distributor filter and O-ring on the stainless column pipe.

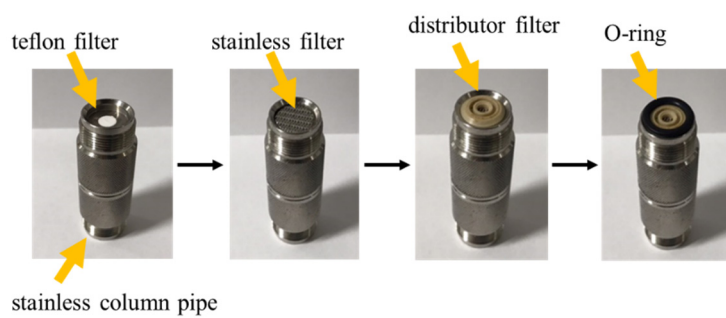

↓ Assemble the column end.

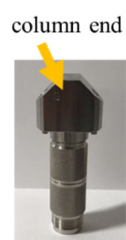

3) Insert ca. 0.48 mL of glass wool tightly into the pipe.

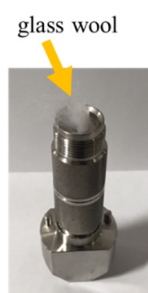

4) Fill the pipe with 50 mg of 3% Pd/SiC.

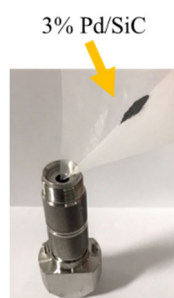

5) Fill the pipe with glass wool tightly to the end of the pipe to fix the catalyst.

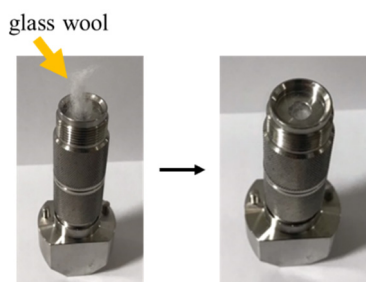

6) Insert the Teflon filter inside the stainless column pipe. Put stainless filter, filter pressing ring and O-ring on the pipe.

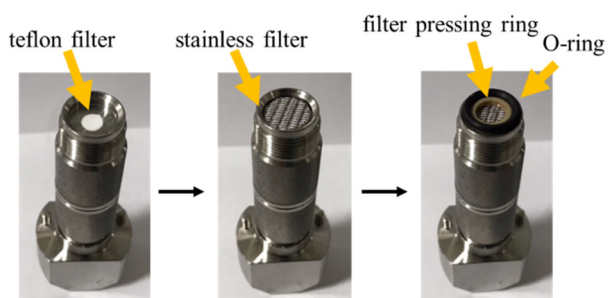

↓ Tighten the column end.

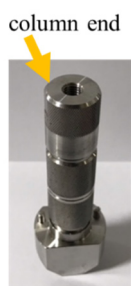

#### 4. Preparation of 3% Pd(DETA)/SiC catalyst (Scheme 4)

A suspension of 3% Pd/SiC [100 mg, 25.3  $\mu\text{mol}$  (2.7 mg, palladium quantity)] and DETA (191.0  $\mu\text{L}$ , 1.77 mmol) in MeOH (1.0 mL) was stirred under argon atmosphere at 25  $^{\circ}\text{C}$  for 7 d. The resulting dark gray solid was collected by filtration (1  $\mu\text{m}$  filter paper), washed with MeOH (5 mL  $\times$  3) and Ether (5 mL  $\times$  3), and dried in vacuo for 24 h to give Pd(DETA)/SiC (98.7 mg). The filtrate was transferred to a 50 mL volumetric flask and diluted to 50 mL with MeOH; 0.02 ppm (2.0  $\mu\text{g}$ ) of palladium species was observed in the diluted filtrate using AAS (SHIMADZU AA-7000). The total palladium species that was leaked from Pd/SiC was 2.0  $\mu\text{g}$ ; thus, the palladium contents of Pd(DETA)/SiC were estimated to be approximately 3%  $[(2.7 - 0.002)/(100 - 0.002) \times 100]$ .

## 5. General procedure for chemoselective hydrogenation under batch conditions (Table 1)

A mixture of the substrate (250  $\mu\text{mol}$ ) and 3% Pd/SiC (8.8 mg, 2.5  $\mu\text{mol}$ ) in MeOH or EtOAc (1.0 mL) was stirred at 25 or 50  $^{\circ}\text{C}$  using a test tube equipped with an  $\text{H}_2$  balloon. The reaction was continuously monitored by thin-layer chromatography. After a specific time, as indicated in Table 1, the mixture was filtered by a membrane filter (pore size: 0.45  $\mu\text{m}$ ). The catalyst on the filter was washed with diethyl ether (5 mL  $\times$  3). The combined filtrates were concentrated in vacuo to afford the corresponding analytically pure product. If necessary, the product was further purified by silica-gel column chromatography (hexane/EtOAc or hexane/diethyl ether).

## 6. General procedures for semihydrogenation of alkynes under batch and continuous-flow conditions

### 6-1. General procedure for semihydrogenation of alkynes under batch conditions (Table 3)

A mixture of the substrate (250  $\mu\text{mol}$ ), 3% Pd/SiC (8.8 mg, 2.5  $\mu\text{mol}$ ), and DETA (40.5  $\mu\text{L}$ , 375  $\mu\text{mol}$ ) in MeOH (1.0 mL) was stirred at 25  $^{\circ}\text{C}$  using a test tube equipped with an  $\text{H}_2$  balloon. The reaction was continuously monitored by thin-layer chromatography. After a specific time, as indicated in Table 3, the mixture was filtered by a membrane filter (pore size: 0.45  $\mu\text{m}$ ). The catalyst on the filter was washed with diethyl ether (5 mL  $\times$  3). The combined filtrates were washed with saturated  $\text{NH}_4\text{Cl}$  aq. (3 mL  $\times$  3) and brine (3 mL  $\times$  1) if additive was used, dried over  $\text{Na}_2\text{SO}_4$ , and concentrated in vacuo to afford the corresponding alkenes with small amounts of substrates and/or alkanes.

### 6-2. General procedure semihydrogenation of alkynes under continuous-flow conditions (Table 4)

A solution of the substrate (500  $\mu\text{mol}$ ) and DETA (162.0  $\mu\text{L}$ , 1.5 mmol) in MeOH (10 mL, 0.05 M) was pumped into the 3% Pd/SiC (50 mg) catalyst-packed cartridge [ $\phi$  5  $\times$  50 mm, stainless] at a flow rate of 0.1 mL/min together with hydrogen gas at a flow rate of 10 mL/min at 25  $^{\circ}\text{C}$  after introducing a flow of MeOH and hydrogen gas into the cartridge under the same condition for ca. 5 min. The cartridge was washed with MeOH (10 mL) and  $\text{CH}_2\text{Cl}_2$  (10 mL), and the combined reaction mixture was collected and concentrated in vacuo. The solution was added to water (3 mL) and extracted with *n*-Hexane / AcOEt = 1 / 1 (6 mL  $\times$  3), dried over  $\text{Na}_2\text{SO}_4$ , and concentrated in vacuo to afford the corresponding alkenes with small amounts of substrates and/or alkanes.

## 7. Optimization of semihydrogenation under batch and continuous-flow conditions

Table S1. Optimization of semihydrogenation reaction under batch conditions

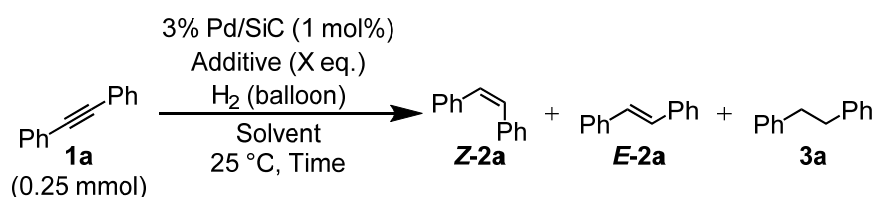

| Entry | Solvent | Additive (X eq.)   | Time (h) | Ratio <sup>a)</sup> |      |      |    |
|-------|---------|--------------------|----------|---------------------|------|------|----|
|       |         |                    |          | 1a                  | Z-2a | E-2a | 3a |
| 1     | MeOH    | -                  | 1        | 2                   | 38   | 2    | 58 |
| 2     | AcOEt   | -                  | 2        | 2                   | 43   | 2    | 53 |
| 3     | MeOH    | Pyridine (1.0 eq.) | 2        | 4                   | 51   | 3    | 42 |
| 4     | MeOH    | DETA (1.0 eq.)     | 2        | 3                   | 86   | 2    | 9  |
| 5     | MeOH    | DETA (1.5 eq.)     | 2        | 2                   | 93   | 2    | 3  |
| 6     | MeOH    | DETA (2.0 eq.)     | 2        | 2                   | 93   | 2    | 3  |

a) Determined by <sup>1</sup>H NMR of the crude mixture.

**Table S2. Optimization of semihydrogenation reaction under continuous-flow conditions**

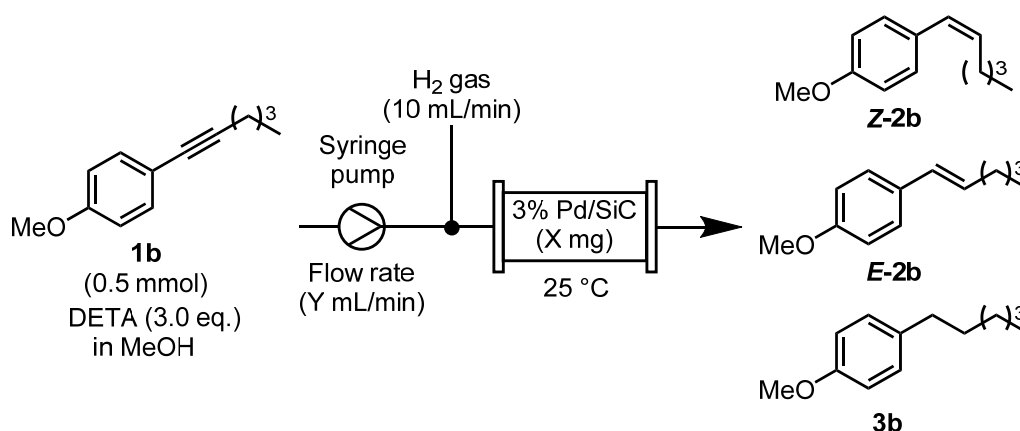

| Entry           | Pd/SiC (X mg) | Flow rate (Y mL/min) | Yield <sup>a)</sup> |      |      |    |
|-----------------|---------------|----------------------|---------------------|------|------|----|
|                 |               |                      | 1b                  | Z-2b | E-2b | 3b |
| 1               | 50            | 0.1                  | 22                  | 72   | 1    | 2  |
| 2               | 70            | 0.1                  | 7                   | 88   | 2    | 3  |
| 3               | 100           | 0.1                  | 6                   | 84   | 2    | 3  |
| 4 <sup>b)</sup> | 50            | 0.1                  | 0                   | 81   | 3    | 6  |
| 5               | 50            | 0.05                 | 3                   | 91   | 2    | 4  |
| 6               | 50            | 0.025                | 5                   | 84   | 3    | 4  |
| 7               | 70            | 0.05                 | 3                   | 90   | 2    | 5  |

a) Determined by <sup>1</sup>H NMR of the crude mixture using ethylene carbonate as an internal standard. b) 50 °C.

## 8. Reuse test of 3% Pd/SiC (Table 2)

A mixture of cinnamyl alcohol (**17**, 1.07 g, 8.0 mmol) and 3% Pd/SiC (293.8 mg, 80.0  $\mu$ mol) in MeOH (32 mL) was stirred under an  $H_2$  atmosphere (balloon). After 4 h, the mixture was filtered through a funnel (1 mm filter paper). The catalyst on the filter was washed with EtOAc (3 mL  $\times$  5), and the filtrate was concentrated in vacuo to afford 3-

phenylpropanol (**18**). The catalyst on the filter was dried in vacuo at room temperature overnight and then weighted. The reaction for the second run was carried out in a procedure similar to the first run except for the amount of cinnamyl alcohol (1.01 mg, 7.5 mmol) and 3% Pd/SiC (275.2 mg, 75.0  $\mu$ mol) for 4 h. The reaction for the third run was also carried out likewise the first run except for the usage of substrate and catalyst. The detailed results were summarized below (Table S3).

**Table S3. Reuse test of Pd/SiC**

| <div style="display: flex; align-items: center; justify-content: center;"> <div style="text-align: center;"> 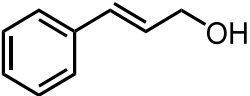 <p><b>17</b></p> </div> <div style="margin: 0 20px; text-align: center;"> <math>\xrightarrow[\text{MeOH (0.25 M), 25 }^{\circ}\text{C, 6 h}]{\text{3\% Pd/SiC (1 mol\%), H}_2 \text{ (balloon)}}</math> </div> <div style="text-align: center;">  <p><b>18</b></p> </div> </div> |                 |                  |                      |                             |
|--------------------------------------------------------------------------------------------------------------------------------------------------------------------------------------------------------------------------------------------------------------------------------------------------------------------------------------------------------------------------------------------------------------------------------------------------------------------------------------------------------------------------------------------------------------------|-----------------|------------------|----------------------|-----------------------------|
| Run                                                                                                                                                                                                                                                                                                                                                                                                                                                                                                                                                                | <b>17</b> usage | Catalyst usage   | Yield (%)            | Catalyst recovery yield (%) |
| 1                                                                                                                                                                                                                                                                                                                                                                                                                                                                                                                                                                  | 1.07 g          | 293.8 mg         | 99                   | 99                          |
|                                                                                                                                                                                                                                                                                                                                                                                                                                                                                                                                                                    | (8.0 mmol)      | (80.0 $\mu$ mol) | (1.08 g, 8.0 mmol)   | (293.5 mg, 80.0 $\mu$ mol)  |
| 2                                                                                                                                                                                                                                                                                                                                                                                                                                                                                                                                                                  | 1.01 g          | 275.2 mg         | quant.               | quant.                      |
|                                                                                                                                                                                                                                                                                                                                                                                                                                                                                                                                                                    | (7.5 mmol)      | (75.0 $\mu$ mol) | (1.03 g, 7.6 mmol)   | (277.3 mg, 75.6 $\mu$ mol)  |
| 3                                                                                                                                                                                                                                                                                                                                                                                                                                                                                                                                                                  | 0.94 g          | 256.9 mg         | 97                   | 95                          |
|                                                                                                                                                                                                                                                                                                                                                                                                                                                                                                                                                                    | (7.0 mmol)      | (70.0 $\mu$ mol) | (921.5 mg, 6.8 mmol) | (244.8 mg, 66.7 $\mu$ mol)  |

## 9. FIB-SEM image, EDX analysis, and XPS spectra of 3% Pd/SiC before and after use

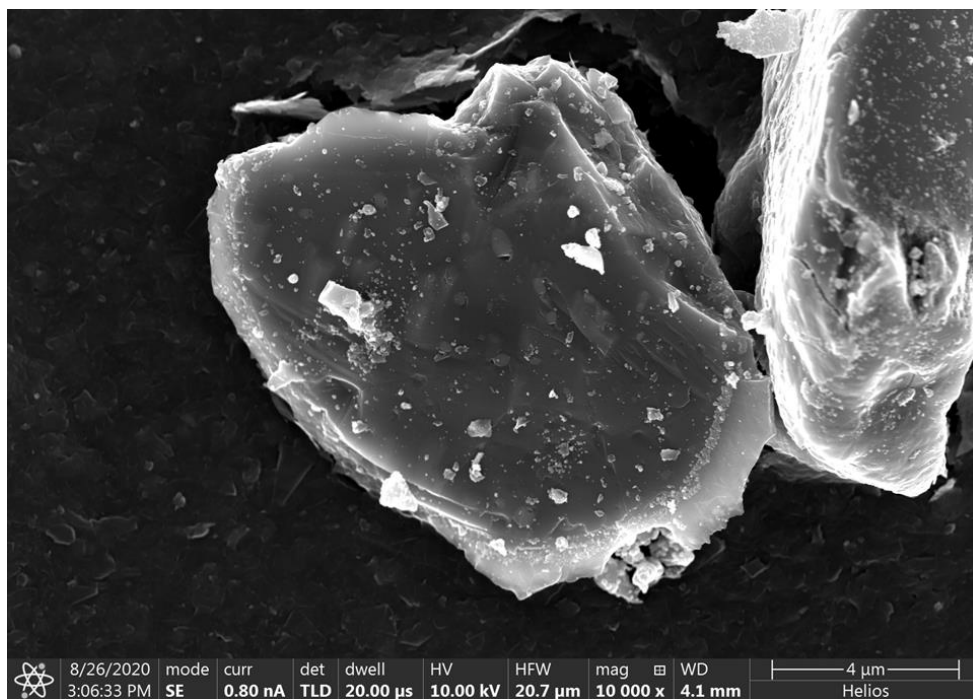

FIB-SEM image of 3% Pd/SiC before use

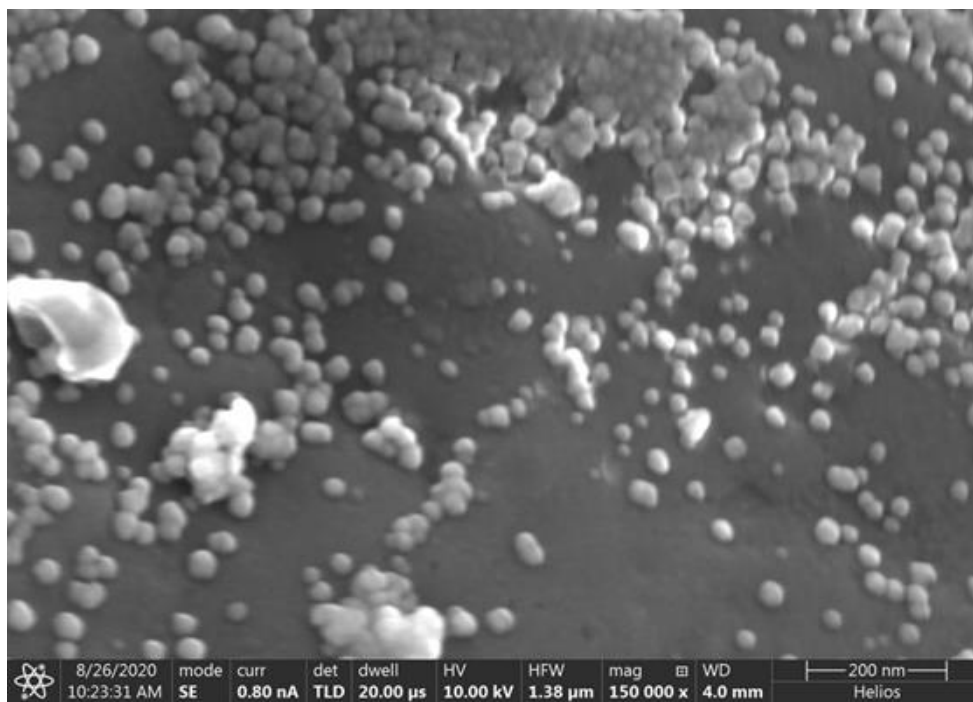

FIB-SEM image of 3% Pd/SiC before use



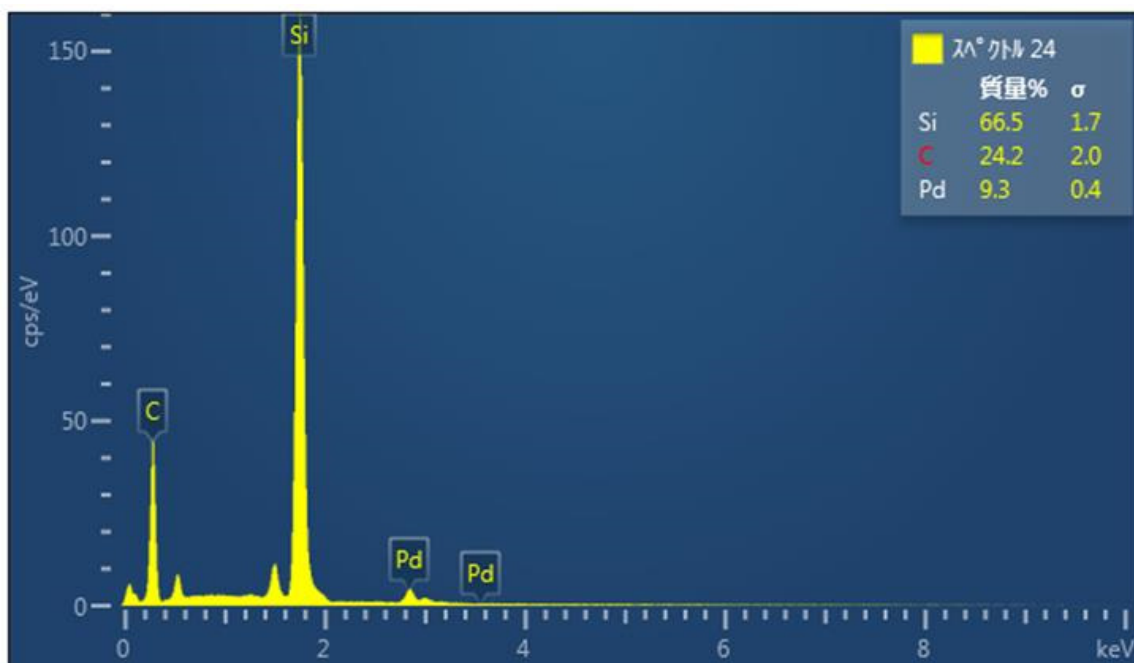

EDX analysis of 3% Pd/SiC before use

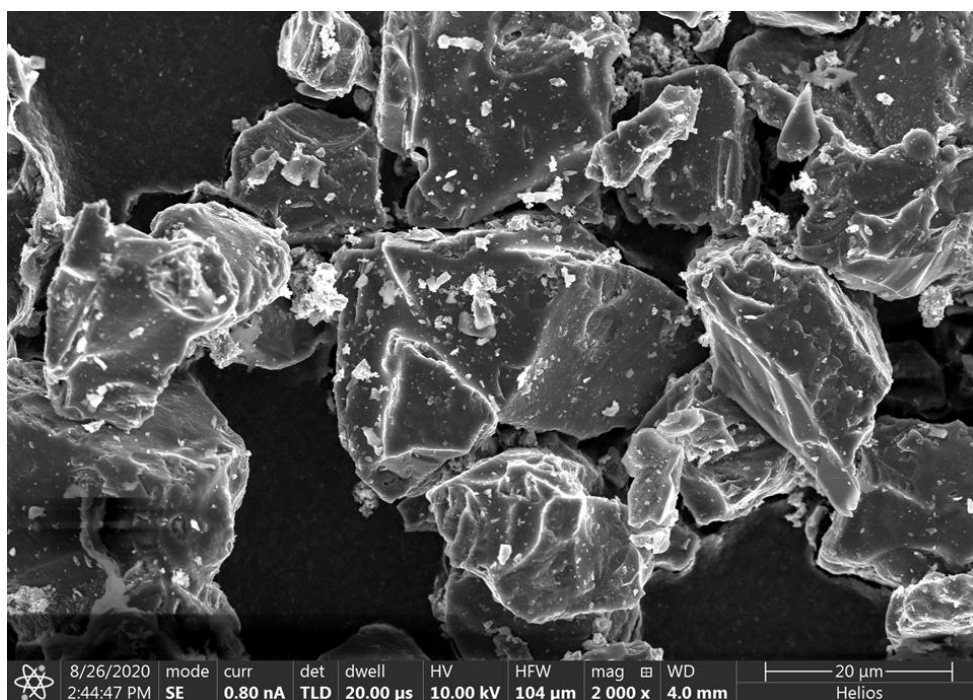

FIB-SEM image of 3% Pd/SiC after use

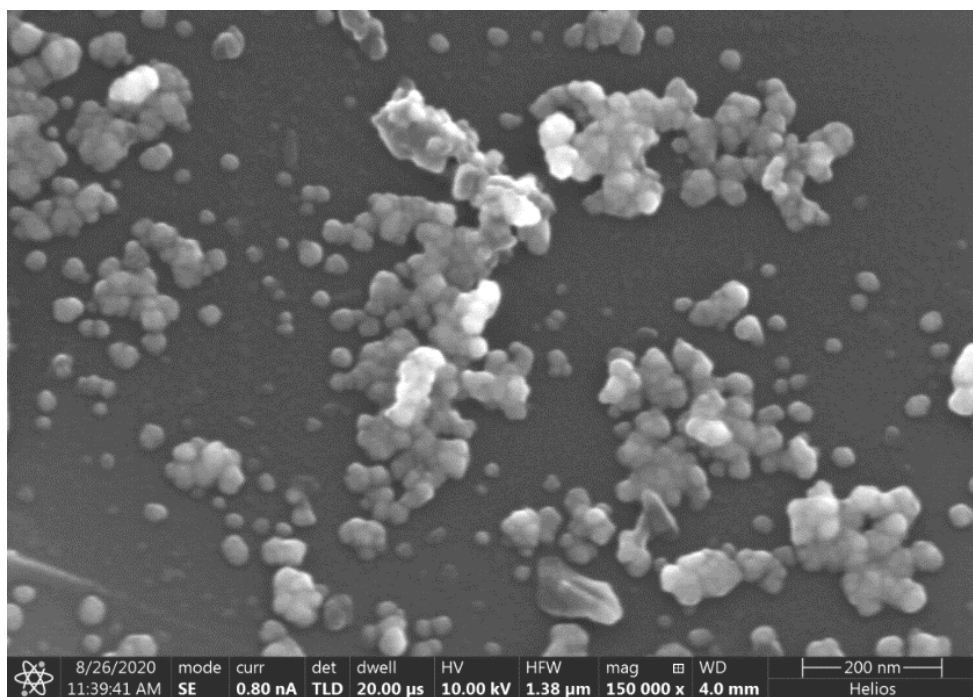

FIB-SEM image of 3% Pd/SiC after use

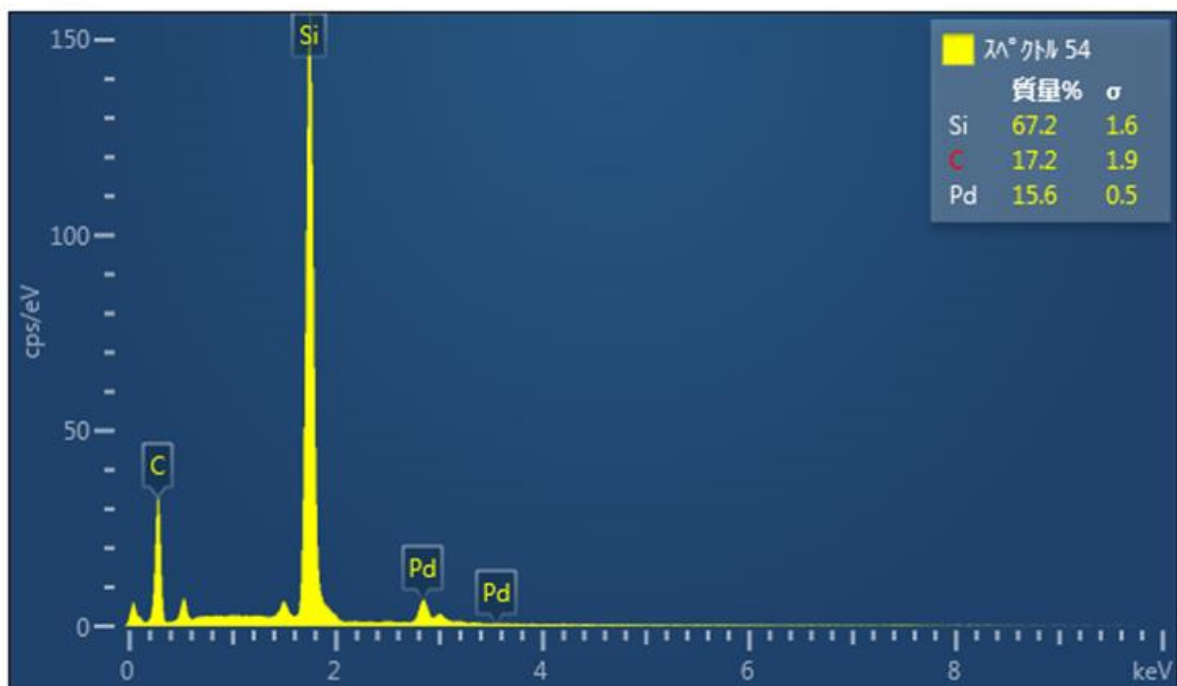

EDX analysis of 3% Pd/SiC after use

## 10. XPS data of 3% Pd/SiC

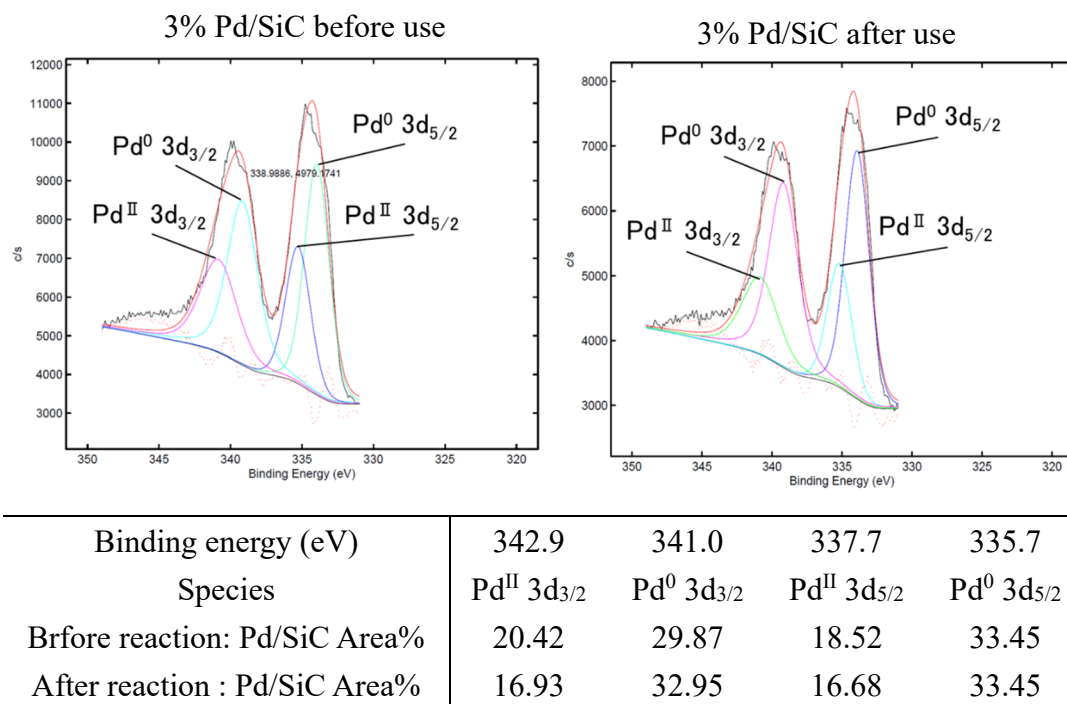

**Figure S1. XPS spectra of 3% Pd/SiC before and after the reaction**

## 11. Long-term continuous-flow semihydrogenation (Figure 3)

**Table S4. Long-term Continuous-flow semihydrogenation of 1c using 3% Pd/SiC**

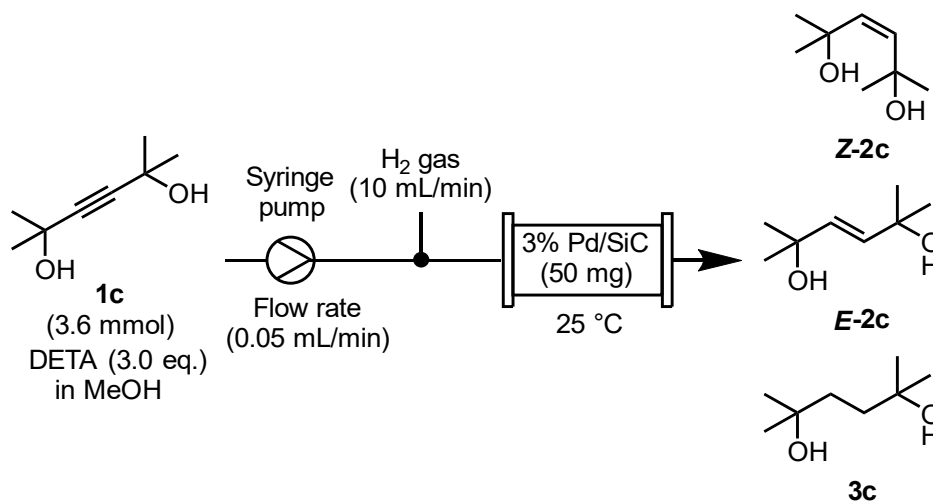

| Entry | Reaction time (h) | Total theoretical amount of material | Yield <sup>a)</sup> |      |      |       |
|-------|-------------------|--------------------------------------|---------------------|------|------|-------|
|       |                   |                                      | 1c                  | Z-2c | E-2c | 3c    |
| 1     | 0–3               | 0.45 mmol                            | 4                   | 94   | 2    | Trace |
| 2     | 3–6               | 0.45 mmol                            | 11                  | 85   | 4    | Trace |
| 3     | 6–12              | 0.90 mmol                            | 20                  | 77   | 2    | 1     |

|   |       |           |    |    |   |   |
|---|-------|-----------|----|----|---|---|
| 4 | 12–18 | 0.90 mmol | 26 | 71 | 2 | 1 |
| 5 | 18–24 | 0.90 mmol | 34 | 65 | 1 | 0 |

a) Determined by  $^1\text{H}$  NMR using ethylene carbonate as an internal standard.

**Table S5. Long-term Continuous-flow semihydrogenation of 1c using 3% Pd(DETA)/SiC**

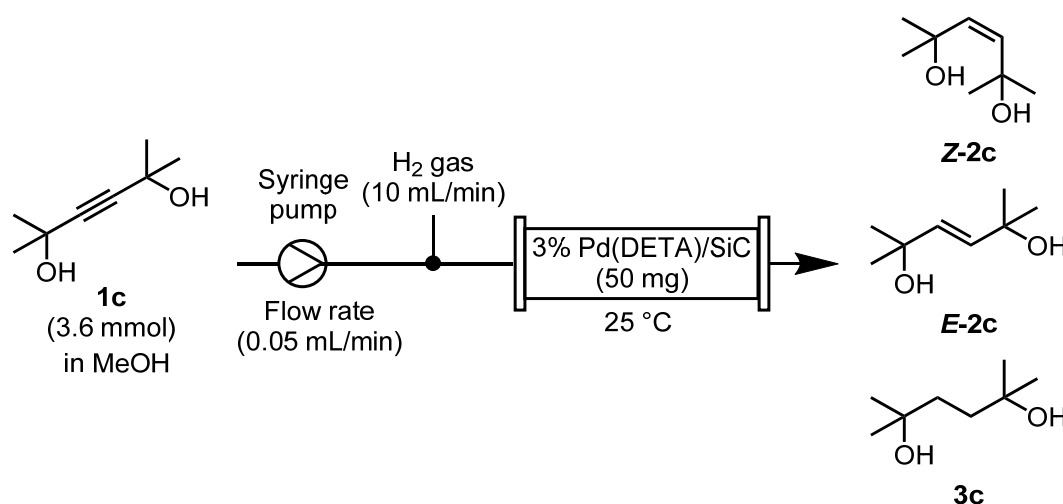

| Entry | Reaction time (h) | Total theoretical amount of material | Yield <sup>a)</sup> |             |             |           |
|-------|-------------------|--------------------------------------|---------------------|-------------|-------------|-----------|
|       |                   |                                      | <b>1c</b>           | <b>Z-2c</b> | <b>E-2c</b> | <b>3c</b> |
| 1     | 0–3               | 0.45 mmol                            | 0                   | 89          | 2           | 1         |
| 2     | 3–6               | 0.45 mmol                            | 0                   | 89          | 2           | 1         |
| 3     | 6–12              | 0.90 mmol                            | 0                   | 90          | 4           | 3         |
| 4     | 12–18             | 0.90 mmol                            | trace               | 90          | 4           | 2         |
| 5     | 18–24             | 0.90 mmol                            | 3                   | 90          | 3           | 2         |

a) Determined by  $^1\text{H}$  NMR using ethylene carbonate as an internal standard.

## 12. Calculation of the residence time

Since 3% Pd/SiC are small particles with a size of about  $<63\ \mu\text{m}$  diameter, the void space would be ignored. Considering the accuracy of the 1 mL disposable syringe and the calculational convenience used in this experiment, the volume of 50 mg 3% Pd/SiC was calculated in this paper as ca.  $100\ \mu\text{L}$  (see, below picture). Therefore, the residence time when the flow rate is 0.1 mL/min is  $0.1\ (\text{mL})/0.1\ (\text{mL}/\text{min}) = 1\ \text{min}$ . (60 seconds). In the case that the flow rate is 0.05 mL/min, the residence time is  $0.1\ (\text{mL})/0.05\ (\text{mL}/\text{min}) = 2\ \text{min}$ . (120 seconds).

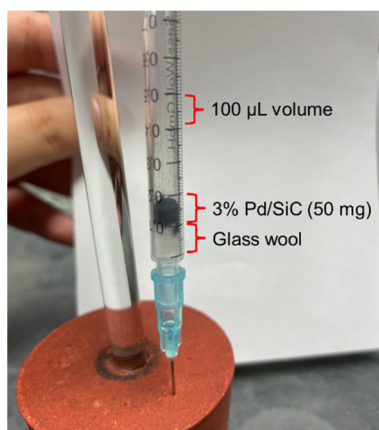

### 13. Spectroscopic data of products

#### Diphenylethane (Table 1 Entry 1) [CAS Reg. No. 103-29-7]<sup>73</sup>

Obtained in quantitative yield (45.3 mg, 0.25 mmol; colorless solid) from diphenylacetylene (44.6 mg, 0.25 mmol).

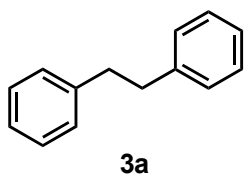

<sup>1</sup>H NMR [500 MHz (ECA-500, CDCl<sub>3</sub>)] δ 7.28 (4H, dd, *J* = 7.5, 7.5 Hz), 7.19 (6H, m), 2.92 (4H, s); <sup>13</sup>C NMR [125 MHz (ECA-500, CDCl<sub>3</sub>)] δ 141.7, 128.4, 128.3, 125.8, 37.9.

#### *p*-Ethylaniline (Table 1, Entry 2 and 3) [CAS Reg. No. 589-16-2]<sup>74</sup>

Obtained in quantitative yield (30.6 mg, 0.25 mmol; yellow liquid) from *p*-ethylnitrobenzene (37.8 mg, 0.25 mmol) or *p*-ethylphenyl azide (36.8 mg, 0.25 mmol).

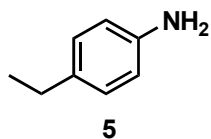

<sup>1</sup>H NMR [400 MHz (ECZ-400, CDCl<sub>3</sub>)] δ 6.89 (2H, d, *J* = 8.0 Hz), 6.62 (2H, d, *J* = 8.0 Hz), 3.52 (2H, brs), 2.54 (2H, q, *J* = 7.6 Hz), 1.18 (3H, t, *J* = 7.6 Hz); <sup>13</sup>C NMR [100 MHz (ECZ-400, CDCl<sub>3</sub>)] δ 143.9, 134.4, 128.5, 115.2, 27.9, 15.9.

#### 4-*tert* Butylaniline (Table1, Entry 4) [CAS Reg. No. 769-92-6]<sup>75</sup>

Obtained in quantitative yield (31.0 mg, 0.25 mmol; brown liquid) from N-*Cbz*-4-*tert* butylaniline (36.8 mg, 0.25 mmol).

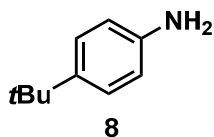

$^1\text{H}$  NMR [500 MHz (ECA-500,  $\text{CDCl}_3$ )]  $\delta$  7.18 (2H, d,  $J = 8.5$  Hz), 6.23 (2H, d,  $J = 8.5$  Hz), 3.54 (2H, brs), 1.27 (9H, s);  $^{13}\text{C}$  NMR [125 MHz (ECA-500,  $\text{CDCl}_3$ )]  $\delta$  143.7, 141.3, 125.9, 114.8, 33.8, 31.4.

**Benzyl phenethylcarbamate (Table 1, Entry 5) [CAS Reg. No. 70867-38-8]<sup>76</sup>**

Obtained in quantitative yield (64.3 mg, 0.25 mmol; peal yellow liquid) from benzyl phenethylcarbamate (63.8 mg, 0.25 mmol).

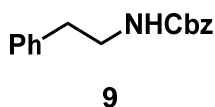

$^1\text{H}$  NMR [500 MHz (ECA-500,  $\text{CDCl}_3$ )]  $\delta$  7.36–7.16 (10H, m), 5.08 (2H, s), 4.80 (1H, brs), 3.45 (2H, m), 2.80 (2H, t,  $J = 7.3$  Hz);  $^{13}\text{C}$  NMR [125 MHz (ECA-500,  $\text{CDCl}_3$ )]  $\delta$  156.2, 138.6, 136.4, 128.7, 128.5, 128.4, 128.0, 126.4, 66.5, 42.1, 35.9.

**2,2-Dimethylpropiophenone (Table 1, Entry 6) [CAS Reg. No. 938-16-9]<sup>77</sup>**

Obtained in quantitative yield (40.8 mg; 0.25 mmol, colorless liquid) from 2,2-dimethylpropiophenone (40.6 mg, 0.25 mmol).

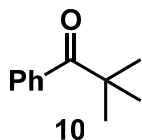

$^1\text{H}$  NMR [400 MHz (ECZ-400,  $\text{CDCl}_3$ )]  $\delta$  7.69–7.67 (2H, m), 7.47–7.37 (3H, m), 1.35 (9H, s);  $^{13}\text{C}$  NMR [100 MHz (ECZ-400,  $\text{CDCl}_3$ )]  $\delta$  209.2, 138.4, 130.7, 127.9, 127.7, 44.1, 27.9.

**Benzyl-4-bromobenzoate (Table 1, Entry 7) [CAS Reg. No. 120-51-4]<sup>78</sup>**

Obtained in quantitative yield (73.4 mg, 0.25 mmol; yellow liquid) from benzyl-4-bromobenzoate (72.8 mg, 0.25 mmol).

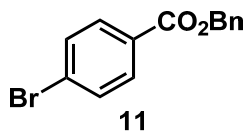

$^1\text{H}$  NMR [500 MHz (ECA-500,  $\text{CDCl}_3$ )]  $\delta$  7.92 (2H, d,  $J = 7.5$  Hz), 7.56 (3H, d,  $J = 7.5$  Hz), 7.44–7.33 (5H, m), 5.35 (2H, s);  $^{13}\text{C}$  NMR [125 MHz (ECA-500,  $\text{CDCl}_3$ )]  $\delta$  165.3, 135.5, 131.4, 130.9, 128.7, 128.4, 128.1, 128.0, 127.9, 66.6.

**Benzyl phenyl ether (Table 1, Entry 8) [CAS Reg. No. 946-80-5]<sup>79</sup>**

Obtained in quantitative yield (46.4 mg, 0.25 mmol; colorless liquid) from benzyl phenyl ether (46.1 mg, 0.25 mmol).

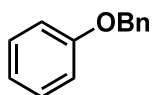

**12**

$^1\text{H}$  NMR [500 MHz (ECA-500,  $\text{CDCl}_3$ )]  $\delta$  7.42 (2H, d,  $J = 7.5$  Hz), 7.38–7.35 (2H, m), 7.32–7.26 (3H, m), 6.98–6.93 (3H, m), 5.04 (2H, s);  $^{13}\text{C}$  NMR [125 MHz (ECA-500,  $\text{CDCl}_3$ )]  $\delta$  158.7, 136.9, 129.4, 128.5, 127.8, 127.4, 120.8, 114.7, 69.8.

**1-Chloronaphthalene (Table 1, Entry 9) [CAS Reg. No. 90-13-1]<sup>80</sup>**

Obtained in quantitative yield (41.0 mg, 0.25 mmol; brown liquid) from 1-chloronaphthalene (40.6 mg, 0.25 mmol).

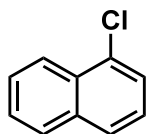

**13**

$^1\text{H}$  NMR [500 MHz (ECA-500,  $\text{CDCl}_3$ )]  $\delta$  8.26 (1H, d,  $J = 8.0$  Hz), 7.82 (1H, d,  $J = 8.0$  Hz), 7.72 (1H, d,  $J = 8.0$  Hz), 7.58–7.49 (3H, m), 7.34 (1H, m);  $^{13}\text{C}$  NMR [125 MHz (ECA-500,  $\text{CDCl}_3$ )]  $\delta$  134.4, 131.8, 130.7, 128.1, 127.1, 127.0, 126.6, 126.1, 125.6, 124.3.

**1, 2-Epoxydodecane (Table 1, Entry 10) [CAS Reg. No. 2855-19-8]<sup>81</sup>**

Obtained in 97% (recovery) yield (44.8 mg, 0.24 mmol; colorless liquid) from 1, 2-Epoxydodecane (46.1 mg, 0.25 mmol).

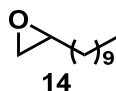

**14**

$^1\text{H}$  NMR [500 MHz (ECA-500,  $\text{CDCl}_3$ )]  $\delta$  2.92–2.89 (1H, m), 2.74 (1H, dd,  $J = 4.5, 4.5$  Hz), 2.46 (1H, dd,  $J = 4.5, 2.0$  Hz), 1.53–1.26 (18H, m), 0.88 (3H, t,  $J = 7.5$  Hz);  $^{13}\text{C}$  NMR [125 MHz (ECA-500,  $\text{CDCl}_3$ )]  $\delta$  52.3, 47.0, 32.4, 31.8, 29.5, 29.5, 29.4, 29.2, 25.9, 22.6, 14.0.

**1-(*tert*-Butyldimethylsilyl)oxy-3-phenylpropane (Table 1, Entry 11) [CAS Reg. No. 69404-95-1]<sup>82</sup>**

Obtained in quantitative yield (62.8 mg, 0.25 mmol; colorless liquid) from *tert*-butyl(cinnamyloxy)dimethylsilane (62.1 mg, 0.25 mmol).

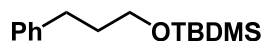

**16**

$^1\text{H}$  NMR [500 MHz (ECA-500,  $\text{CDCl}_3$ )]  $\delta$  7.28 (2H, m), 7.20–7.16 (3H, m), 3.64 (2H, t,  $J = 6.1$  Hz), 2.67 (2H, t,  $J = 8.0$  Hz), 1.84 (2H, tt,  $J = 6.1, 8.0$  Hz), 0.91 (9H, s), 0.05 (6H, s);  $^{13}\text{C}$  NMR [125 MHz (ECA-500,  $\text{CDCl}_3$ )]  $\delta$  142.2, 128.4, 128.2, 125.6, 62.3, 34.4, 32.0, 25.9, 18.3, -5.2.



**3-Phenyl-1-propanol (Table 2) [CAS Reg. No. 122-97-4]<sup>73</sup>**

Obtained in 99% yield (1.08 g, 8.0 mmol; colorless oil) from cinnamyl alcohol (1.07 g, 8.0 mmol).

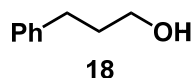

<sup>1</sup>H NMR [500 MHz (ECA-500, CDCl<sub>3</sub>)] δ 7.28–7.25 (2H, m), 7.19–7.16 (3H, m), 3.62 (2H, t, *J* = 6.3 Hz), 2.68 (2H, t, *J* = 7.8 Hz), 1.89–1.83 (2H, m); <sup>13</sup>C NMR [125 MHz (ECA-500, CDCl<sub>3</sub>)] δ 141.6, 128.1, 128.0, 125.5, 61.4, 33.8, 31.7.

**(Z)-1,2-Diphenylethene [CAS Reg. No. 645-49-8]<sup>83</sup>**

Table 3, Entry 1: Purification by crystallization with CHCl<sub>3</sub> and hexane at 0 °C to obtain **2a** in 52% isolated yield (23.4 mg, 0.13 mmol; colorless solid).

Table 4, Entry 1: Purification by crystallization with CHCl<sub>3</sub> and hexane at 0 °C to obtain **2a** in 44% isolated yield (39.3 mg, 0.26 mmol; colorless solid).

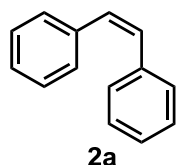

<sup>1</sup>H NMR [400 MHz (ECZ-400, CDCl<sub>3</sub>)] δ 7.26–7.16 (m, 10H), 6.60 (s, 2H); <sup>13</sup>C NMR [100 MHz (ECZ-400, CDCl<sub>3</sub>)] δ 137.2, 130.2, 128.8, 128.2, 127.1.

**(Z)-1-(Hex-1-enyl)-4-methoxybenzene (Table 4, Entry 2) [CAS Reg. No. 146646-32-4]<sup>84</sup>**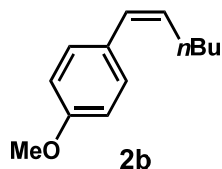

<sup>1</sup>H NMR [500 MHz (ECA-500, CDCl<sub>3</sub>)] δ 7.22 (d, *J* = 10.0 Hz, 2H), 6.87 (d, *J* = 10.0 Hz, 2H), 6.34 (d, *J* = 12.0 Hz, 1H), 5.60–5.54 (m, 1H), 3.81 (s, 1H), 2.34–2.30 (m, 2H), 1.46–1.32 (m, 4H), 0.90 (t, *J* = 7.3 Hz, 3H); <sup>13</sup>C NMR [100 MHz (ECZ-400, CDCl<sub>3</sub>)] δ 158.0, 131.7, 130.5, 129.9, 128.0, 113.5, 55.2, 32.2, 28.3, 22.4, 14.0.

**(Z)-2,5-Dimethylhex-3-ene-2,5-diol [CAS Reg. No. 6177-86-4]<sup>85</sup>**

Table 3, Entry 1: Purification by crystallization with CHCl<sub>3</sub> and hexane to obtain **2c** in 85% isolated yield (30.6 mg, 0.21 mmol; colorless solid).

Table 4, Entry 1: Purification by crystallization with CHCl<sub>3</sub> and hexane to obtain **2c** in 83% isolated yield (59.7 mg, 0.42 mmol; colorless solid).

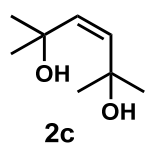

<sup>1</sup>H NMR [400 MHz (ECZ-400, CDCl<sub>3</sub>)] δ 5.35 (s, 2H), 4.29 (br, 2H), 1.40 (s, 12H); <sup>13</sup>C NMR [125 MHz (ECA-500, CDCl<sub>3</sub>)] δ 135.4, 71.2, 31.6.

**2-Methoxy-6-vinylnaphthalene (Table 4, Entry 4) [CAS Reg. No. 63444-51-9]<sup>83</sup>**

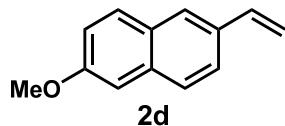

<sup>1</sup>H NMR [400 MHz (ECZ-400, CDCl<sub>3</sub>)] δ 7.71–7.67 (m, 3H), 7.60 (d, *J* = 8.8 Hz, 1H), 7.13–7.10 (m, 2H), 6.84 (dd, *J* = 17.4, 11.0 Hz, 1H), 5.81 (d, *J* = 17.4 Hz, 1H), 5.27 (d, *J* = 11.0 Hz, 1H), 3.91 (s, 3H); <sup>13</sup>C NMR [100 MHz (ECZ-400, CDCl<sub>3</sub>)] δ 157.7, 136.9, 134.2, 132.9, 129.5, 128.9, 127.0, 126.2, 123.7, 118.9, 113.1, 105.7, 55.3.

***N*-Benzyloxycarbonyl-4-aminostyrene (Table 4, Entry 5) [CAS Reg. No. 227778-64-5]<sup>86</sup>**

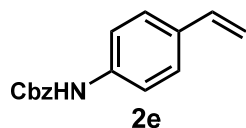

<sup>1</sup>H NMR [400 MHz (ECZ-400, CDCl<sub>3</sub>)] δ 7.42–7.36 (m, 9H), 6.66 (dd, *J* = 17.3, 11.0 Hz, 2H), 5.67 (d, *J* = 17.3 Hz, 1H), 5.21–5.17 (m, 3H); <sup>13</sup>C NMR [125 MHz (ECA-500, CDCl<sub>3</sub>)] δ 153.1, 137.3, 136.0, 135.9, 133.0, 128.6, 128.4, 128.3, 126.9, 118.5, 112.7, 67.1.

**1-(4-Vinylphenyl)ethanone (Table 4, Entry 6) [CAS Reg. No. 10537-63-0]<sup>87</sup>**

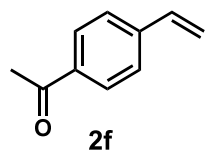

<sup>1</sup>H NMR [500 MHz (ECA-500, CDCl<sub>3</sub>)] δ 7.92 (d, *J* = 8.0 Hz, 2H), 7.49 (d, *J* = 8.0 Hz, 2H), 6.76 (dd, *J* = 17.7, 11.1 Hz, 1H), 5.88 (d, *J* = 17.7 Hz, 1H), 5.40 (d, *J* = 11.1 Hz, 1H), 2.60 (s, 3H); <sup>13</sup>C NMR [125 MHz (ECA-500, CDCl<sub>3</sub>)] δ 197.6, 142.1, 136.2, 135.9, 128.7, 126.3, 116.7, 26.6.

**4-Vinylaniline (Table 4, Entry 7) [CAS Reg. No. 1520-21-4]<sup>88</sup>**

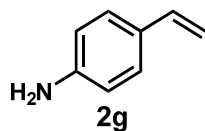

<sup>1</sup>H NMR [400 MHz (ECZ-400, CDCl<sub>3</sub>)] δ 7.23 (d, *J* = 8.8 Hz, 2H), 6.65–6.55 (m, 3H), 5.54 (d, *J* = 17.2 Hz, 1H), 5.04 (d, *J* = 10.8 Hz, 1H), 3.69 (br, 2H); <sup>13</sup>C NMR [100 MHz (ECZ-400, CDCl<sub>3</sub>)] δ 146.1, 136.5, 128.3, 127.3, 115.0, 110.0.

**1-Nitro-4-vinylbenzene (Table 3, Entry 10) [CAS Reg. No. 1520-21-4]<sup>89</sup>**

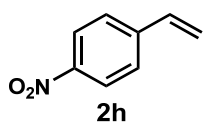

$^1\text{H}$  NMR [500 MHz (ECA-500,  $\text{CDCl}_3$ )]  $\delta$  8.20 (d,  $J$  = 8.8 Hz, 2H), 7.54 (d,  $J$  = 8.8 Hz, 2H), 6.79 (dd,  $J$  = 17.5, 11.0 Hz, 1H), 5.94 (d,  $J$  = 17.5, 1H), 5.51 (d,  $J$  = 11.0 Hz, 1H);  $^{13}\text{C}$  NMR [100 MHz (ECZ-400,  $\text{CDCl}_3$ )]  $\delta$  147.1, 143.8, 134.9, 126.8, 123.9, 118.6.

**17 $\alpha$ -Vinyl-1,3,5(10)-estratriene-3,17 $\beta$ -diol (Table 4, Entry 9) [CAS Reg. No. 7678-95-7]<sup>73</sup>**

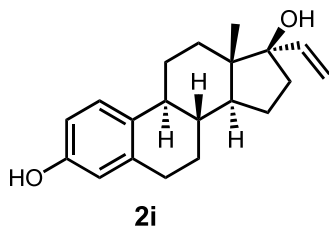

$^1\text{H}$  NMR [500 MHz (ECA-500,  $\text{CD}_3\text{OD}$ )]  $\delta$  7.08 (d,  $J$  = 8.3 Hz, 1H), 6.56 (d,  $J$  = 8.3 Hz, 1H), 6.50 (s, 1H), 6.13 (dd,  $J$  = 17.3, 10.9 Hz, 1H), 5.19 (d,  $J$  = 17.3 Hz, 1H), 5.13 (d,  $J$  = 10.9 Hz, 1H), 2.86–2.78 (m, 2H), 2.30–2.27 (m, 1H), 2.00–1.89 (m, 4H), 1.79–1.73 (m, 1H), 1.67–1.64 (m, 1H), 1.53–1.41 (m, 6H), 0.96 (s, 3H);  $^{13}\text{C}$  NMR [125 MHz (ECA-500,  $\text{CD}_3\text{OD}$ )]  $\delta$  156.8, 145.5, 140.0, 133.4, 128.0, 116.9, 114.6, 113.1, 85.9, 51.0, 48.7, 46.0, 42.0, 37.2, 34.3, 31.6, 29.6, 28.5, 25.1, 15.6.

## 14. $^1\text{H}$ and $^{13}\text{C}$ spectra of products

### $^1\text{H}$ NMR of diphenylethane (3a)

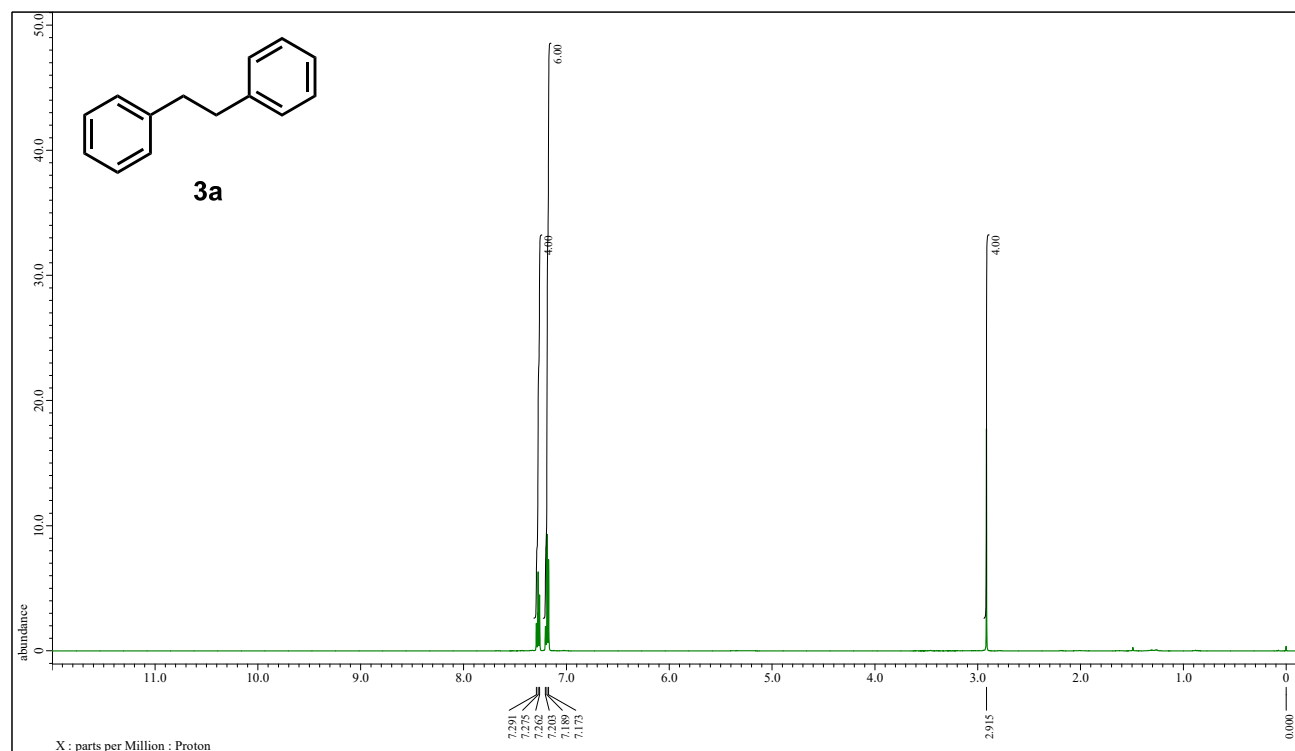

### $^{13}\text{C}$ NMR of diphenylethane (3a)

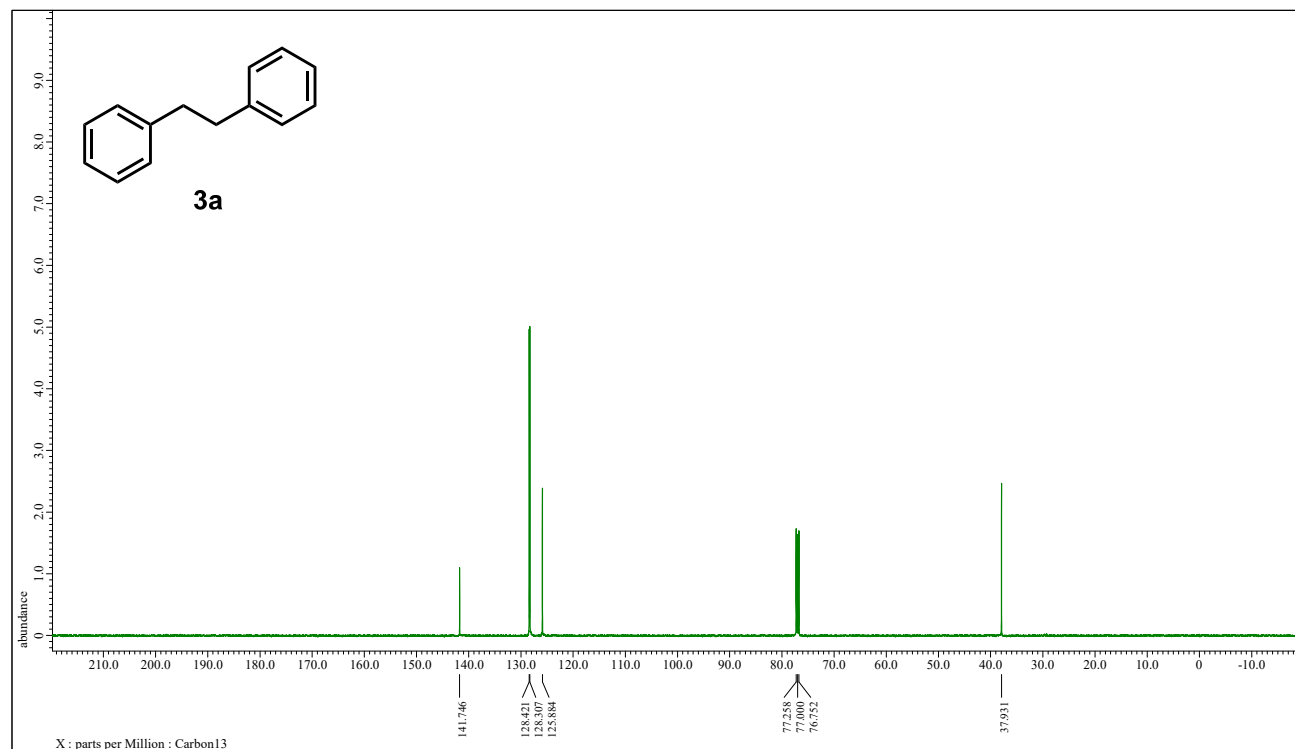

<sup>1</sup>H NMR of *p*-ethylaniline (5)

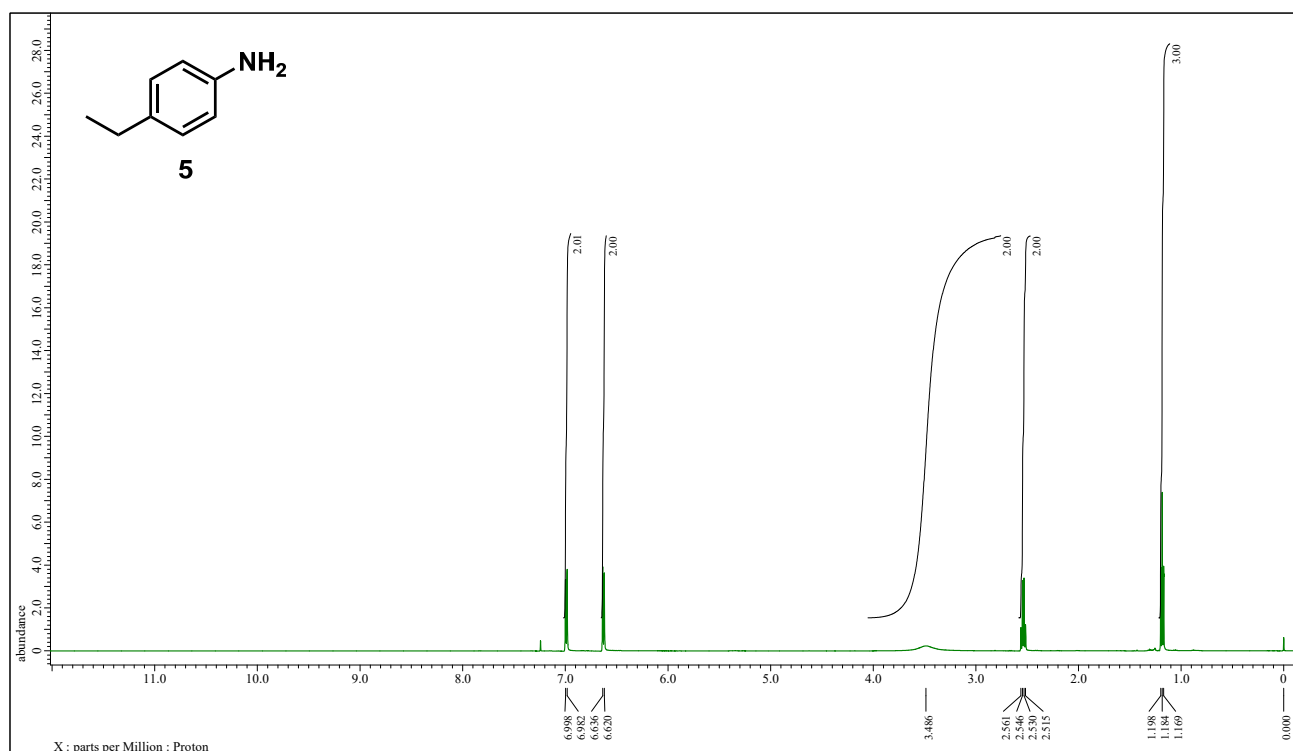

<sup>13</sup>C NMR of *p*-ethylaniline (5)

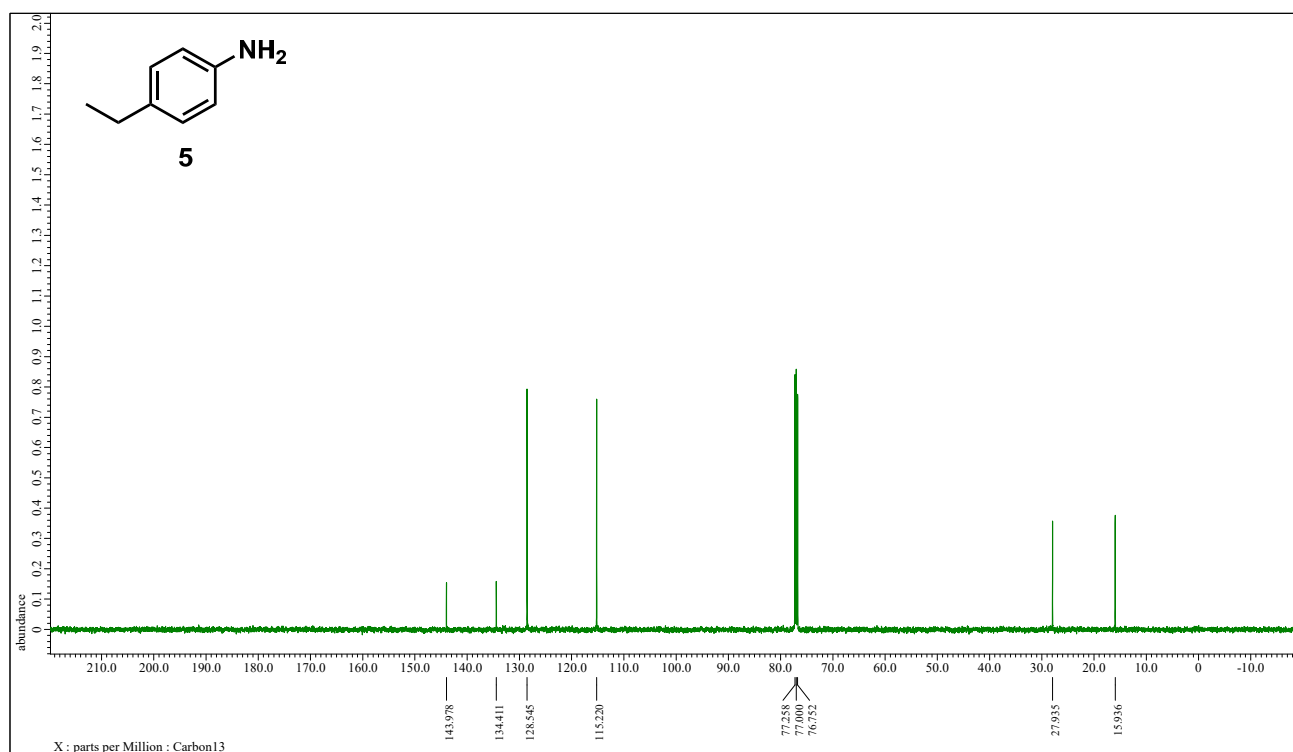

**<sup>1</sup>H NMR of 4-*tert* butylaniline (8)**

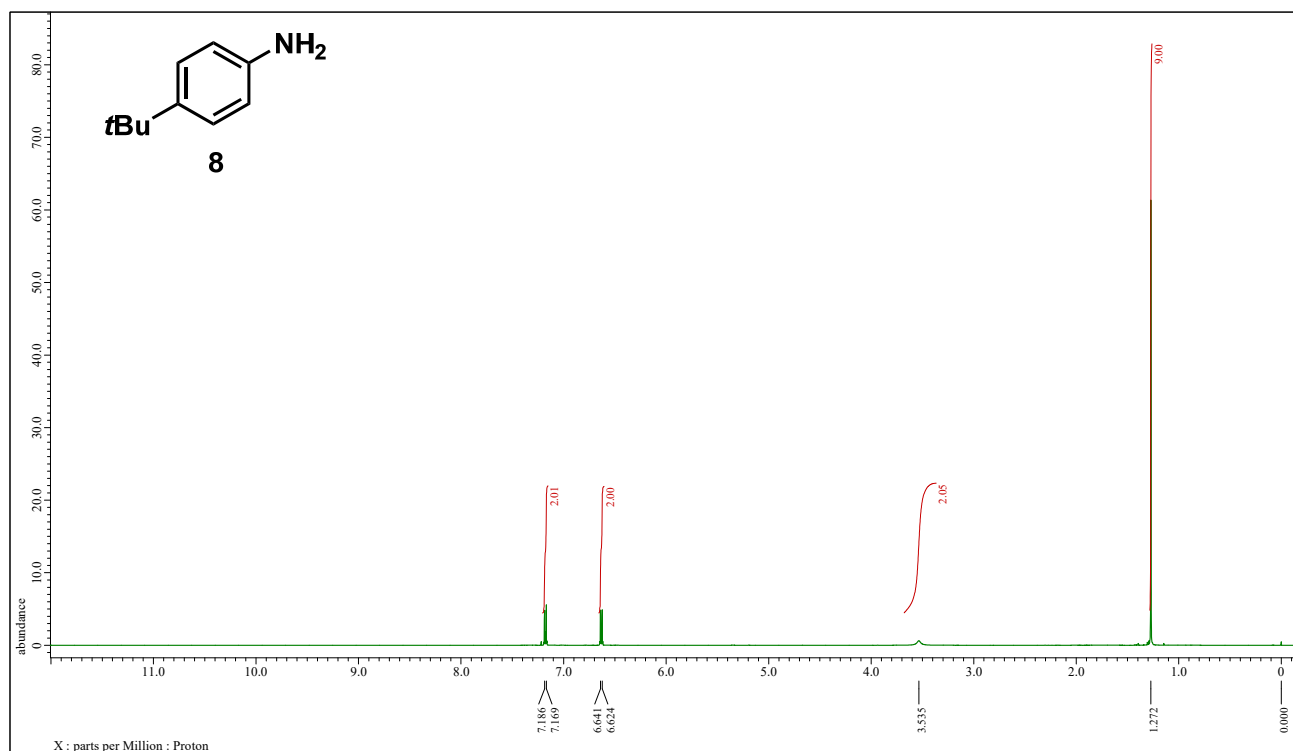

**<sup>13</sup>C NMR of 4-*tert* butylaniline (8)**

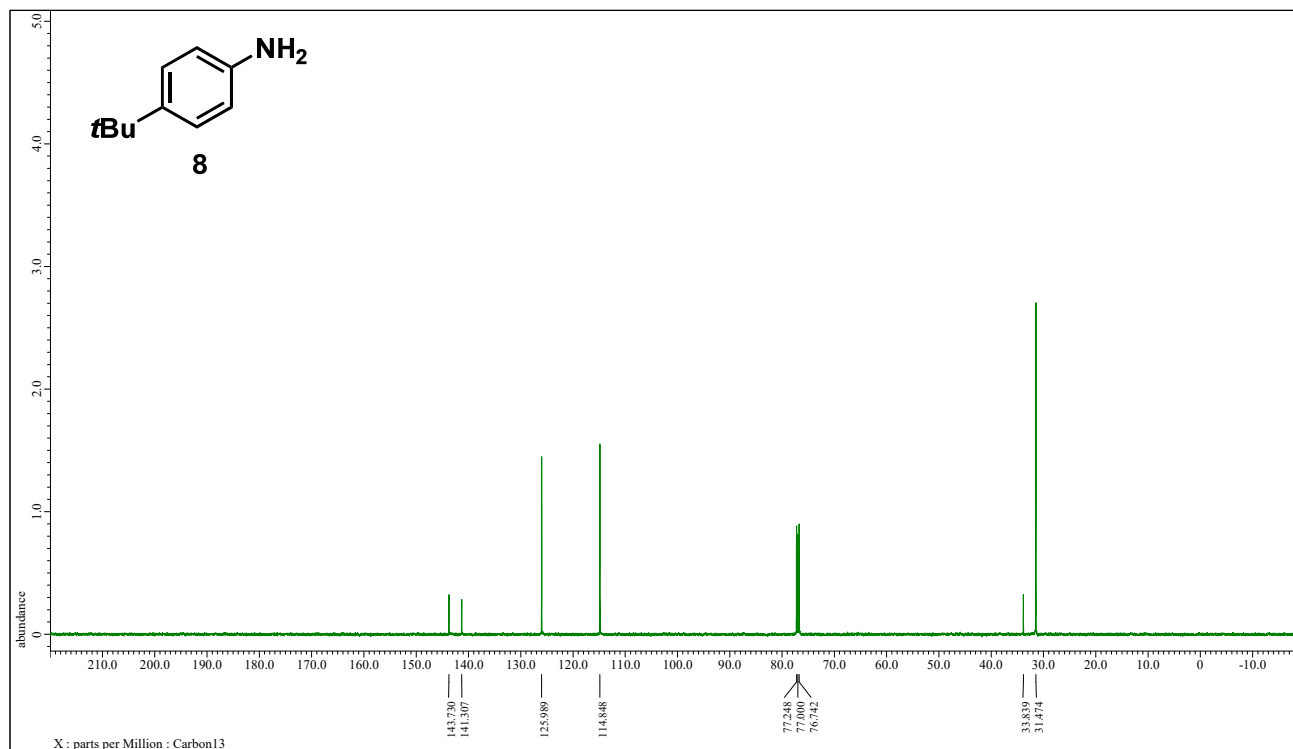

# <sup>1</sup>H NMR of benzyl phenethylcarbamate (9)

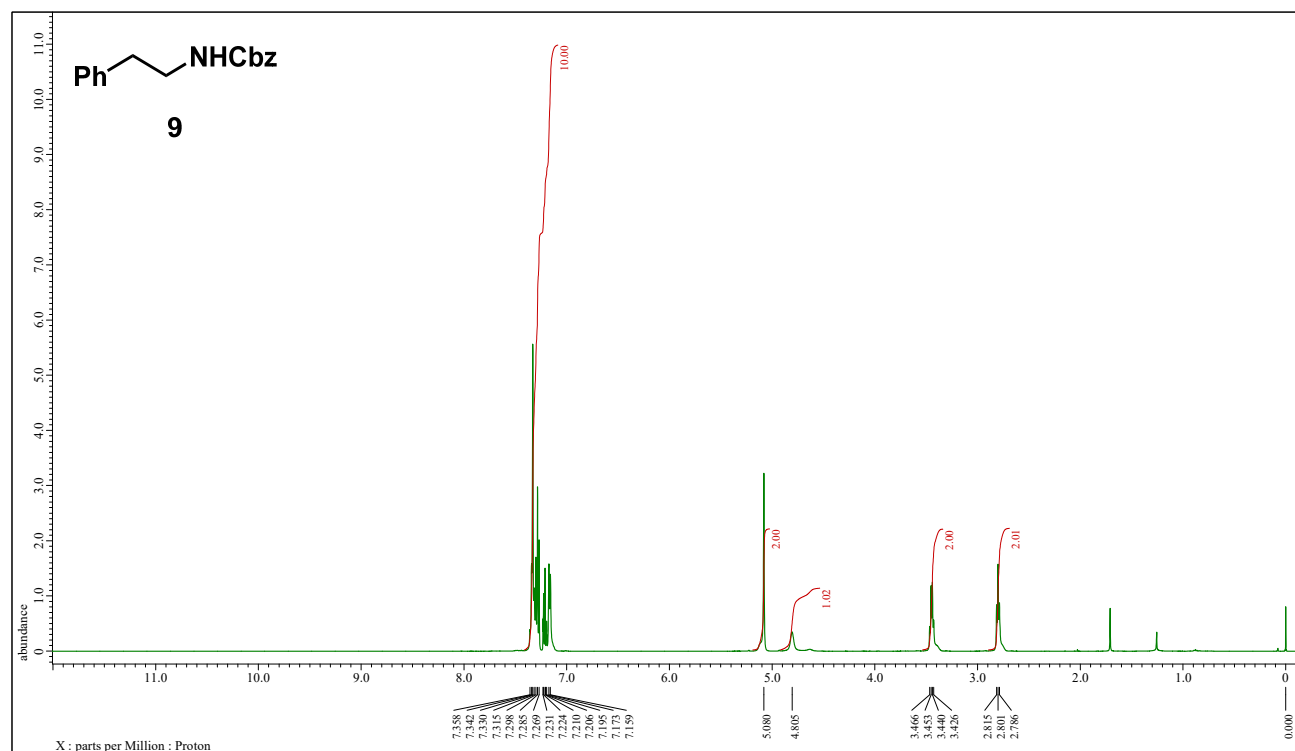

# <sup>13</sup>C NMR of benzyl phenethylcarbamate (9)

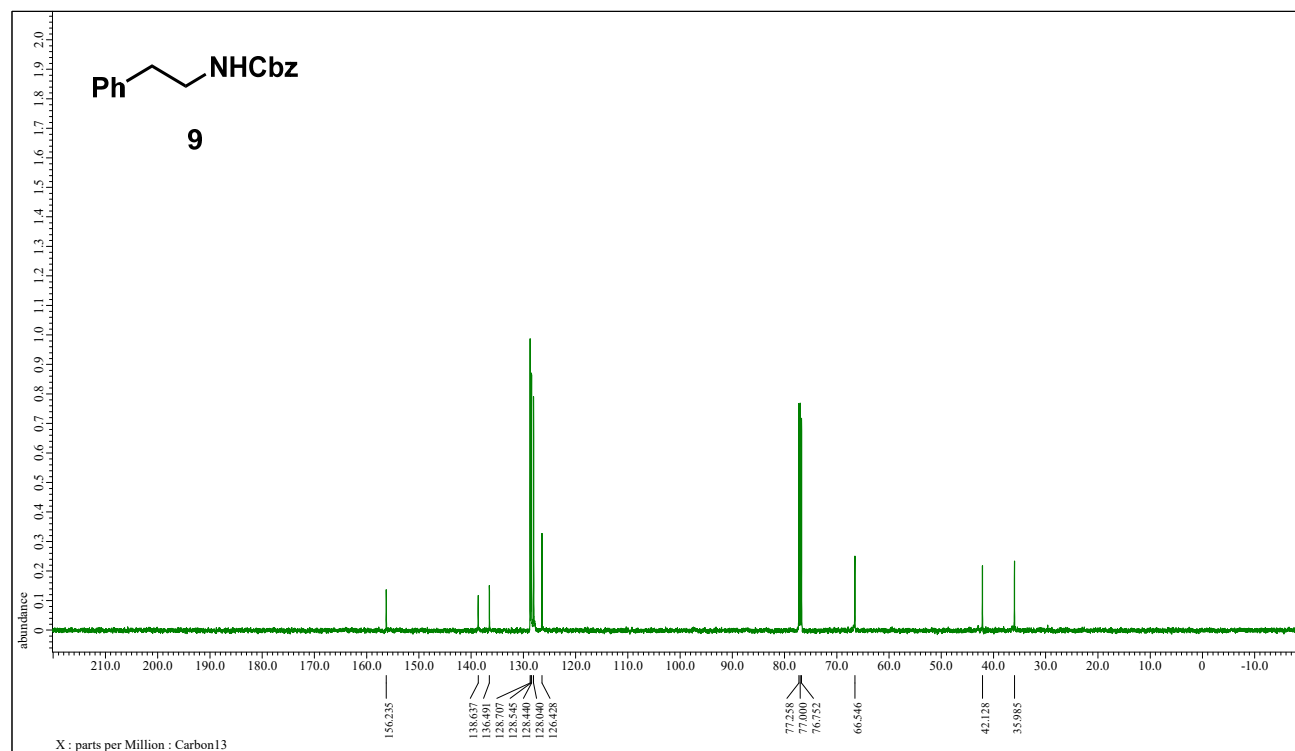

### <sup>1</sup>H NMR of 2,2-dimethylpropiophenone (10)

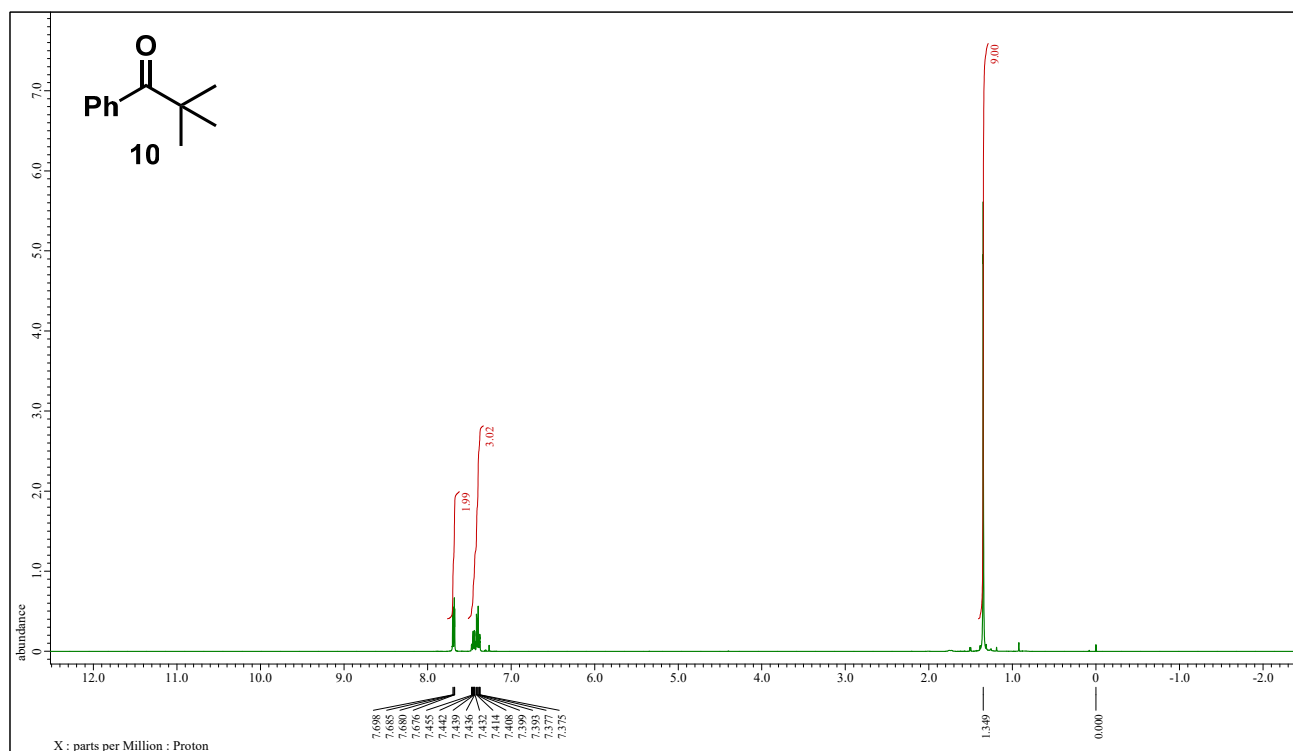

### <sup>13</sup>C NMR of 2,2-dimethylpropiophenone (10)

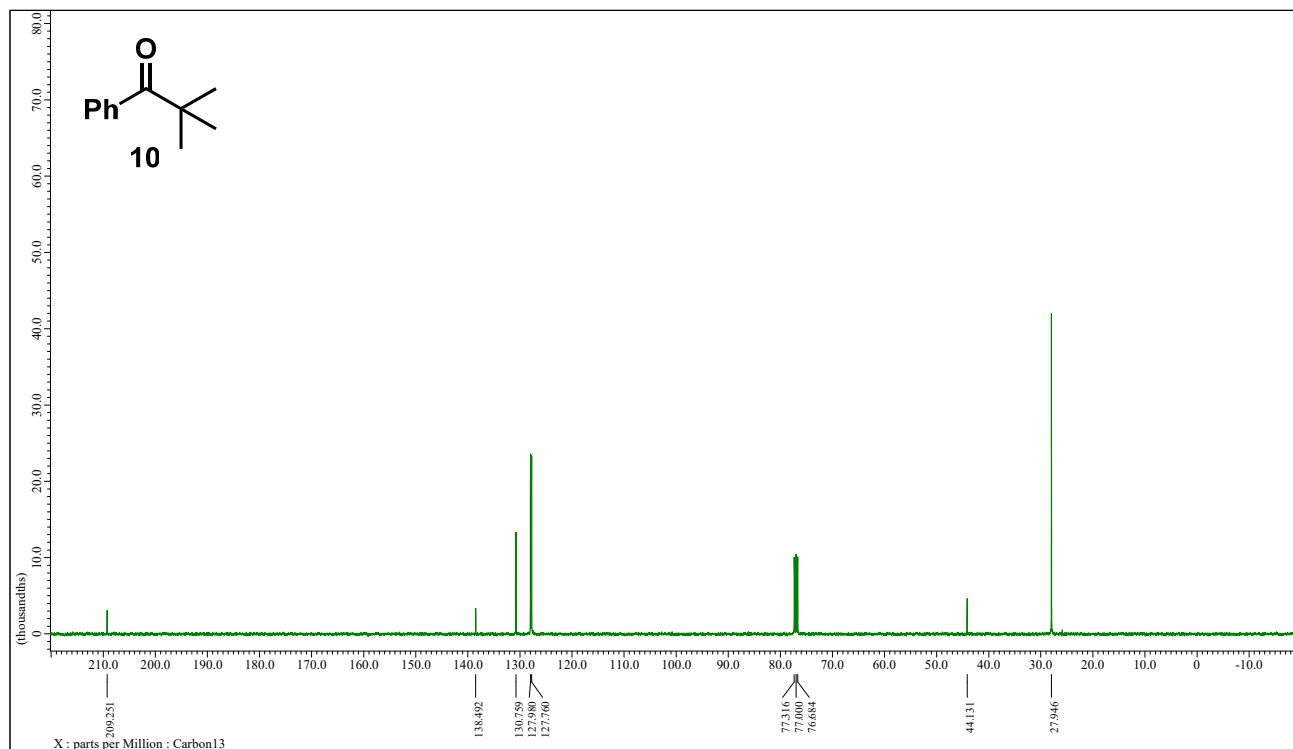



<sup>1</sup>H NMR of benzyl-4-bromobenzoate (11)

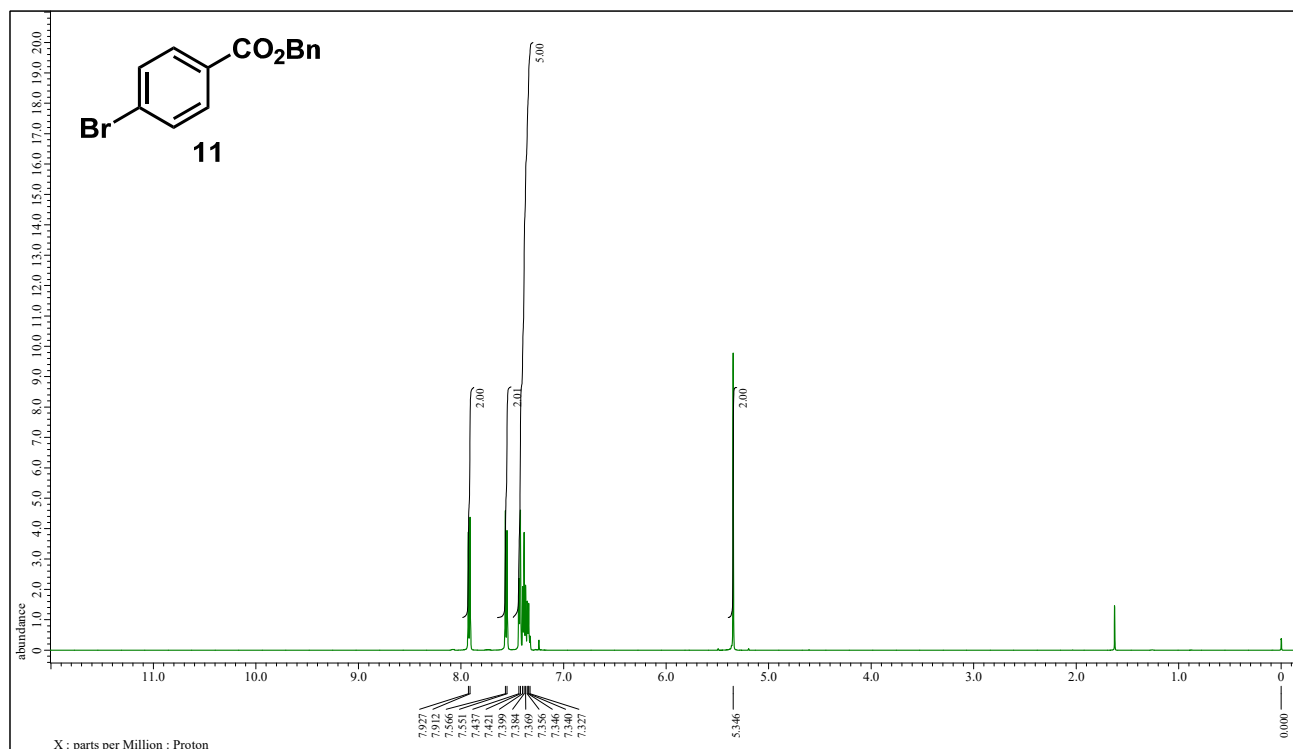

<sup>13</sup>C NMR of benzyl-4-bromobenzoate (11)

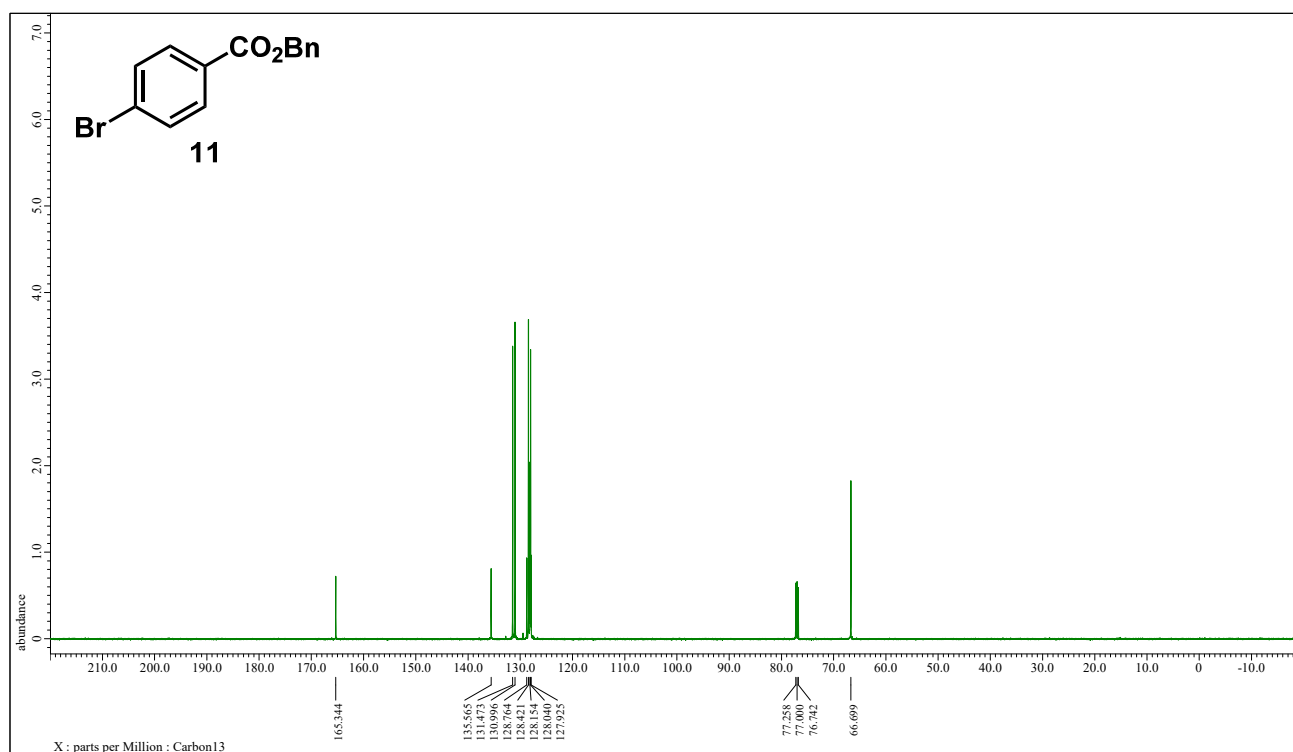

### <sup>1</sup>H NMR of benzyl phenyl ether (12)

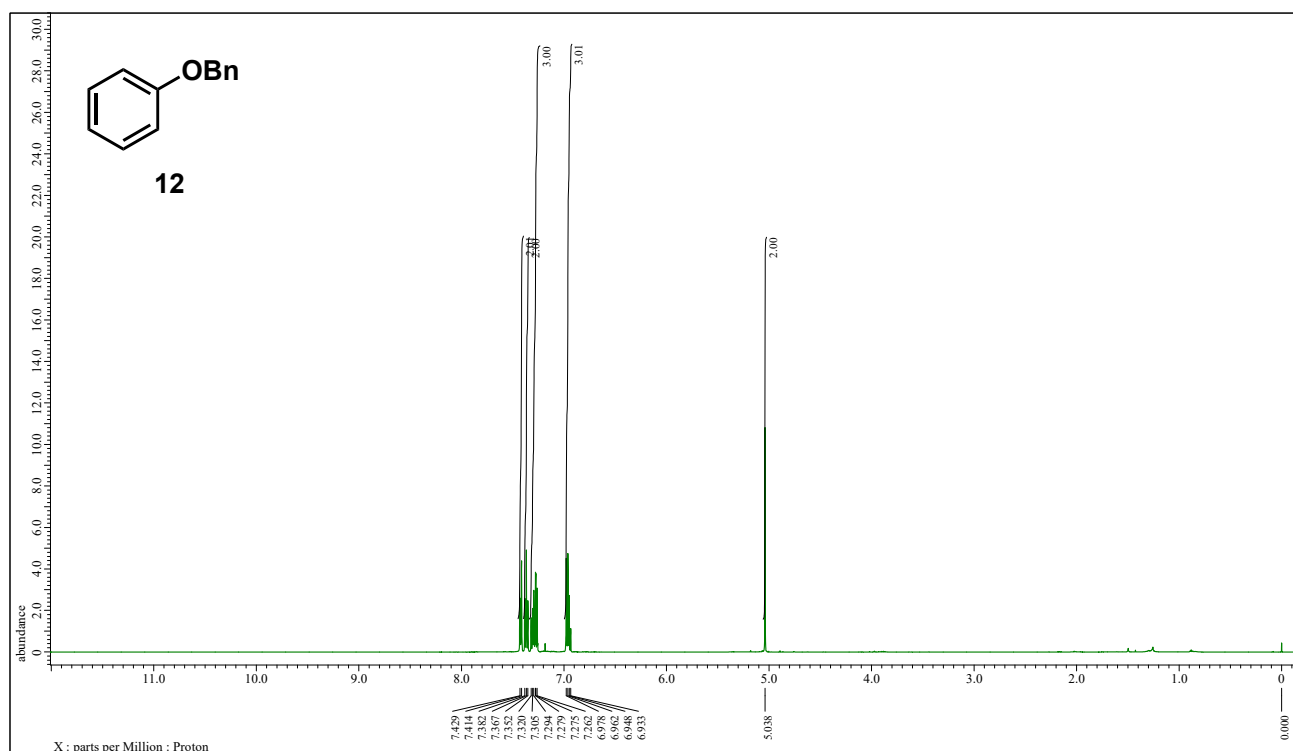

### <sup>13</sup>C NMR of benzyl phenyl ether (12)

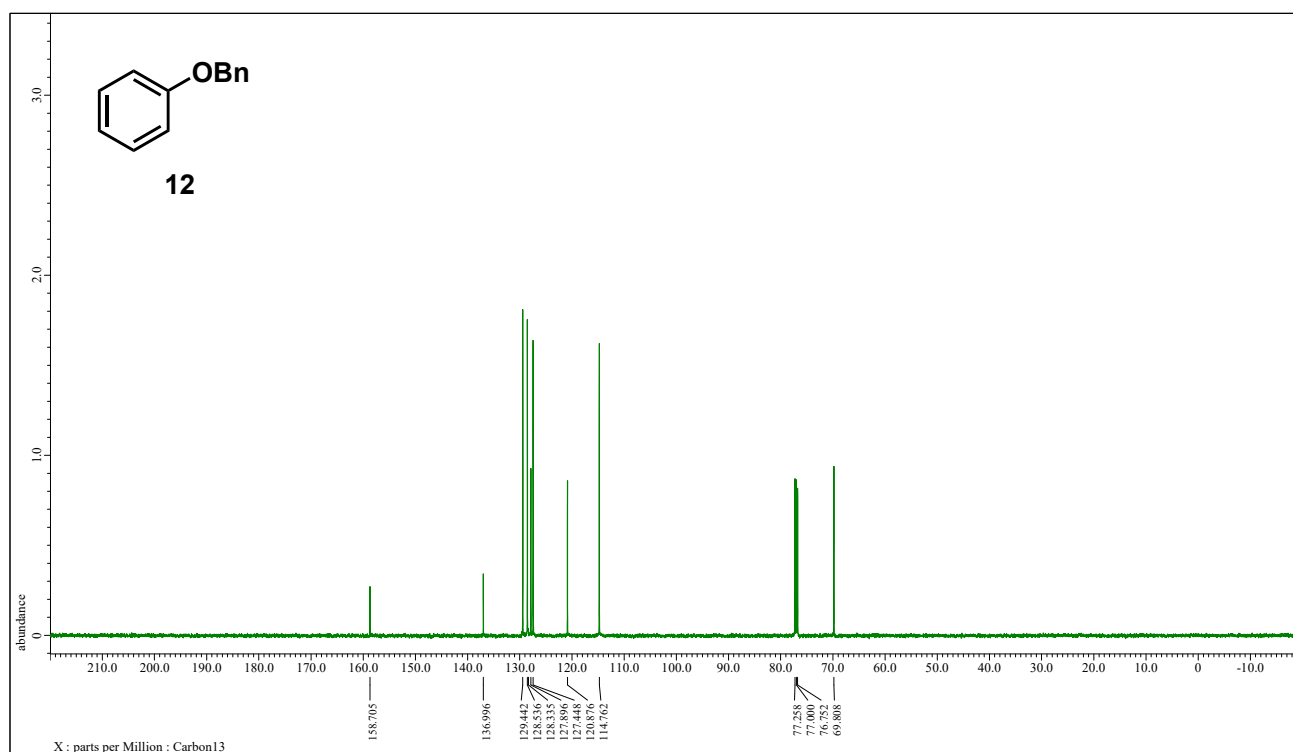

### <sup>1</sup>H NMR of 1-chloronaphthalene (13)

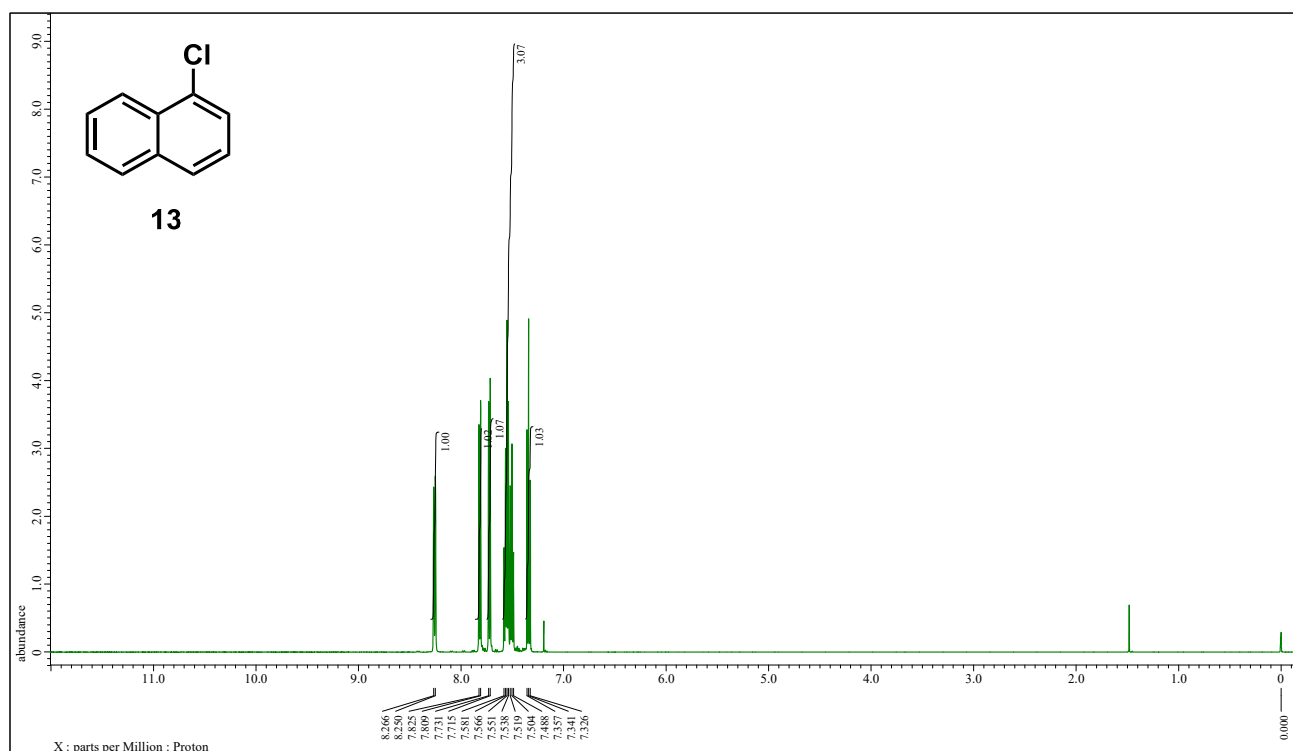

### <sup>13</sup>C NMR of 1-chloronaphthalene (13)

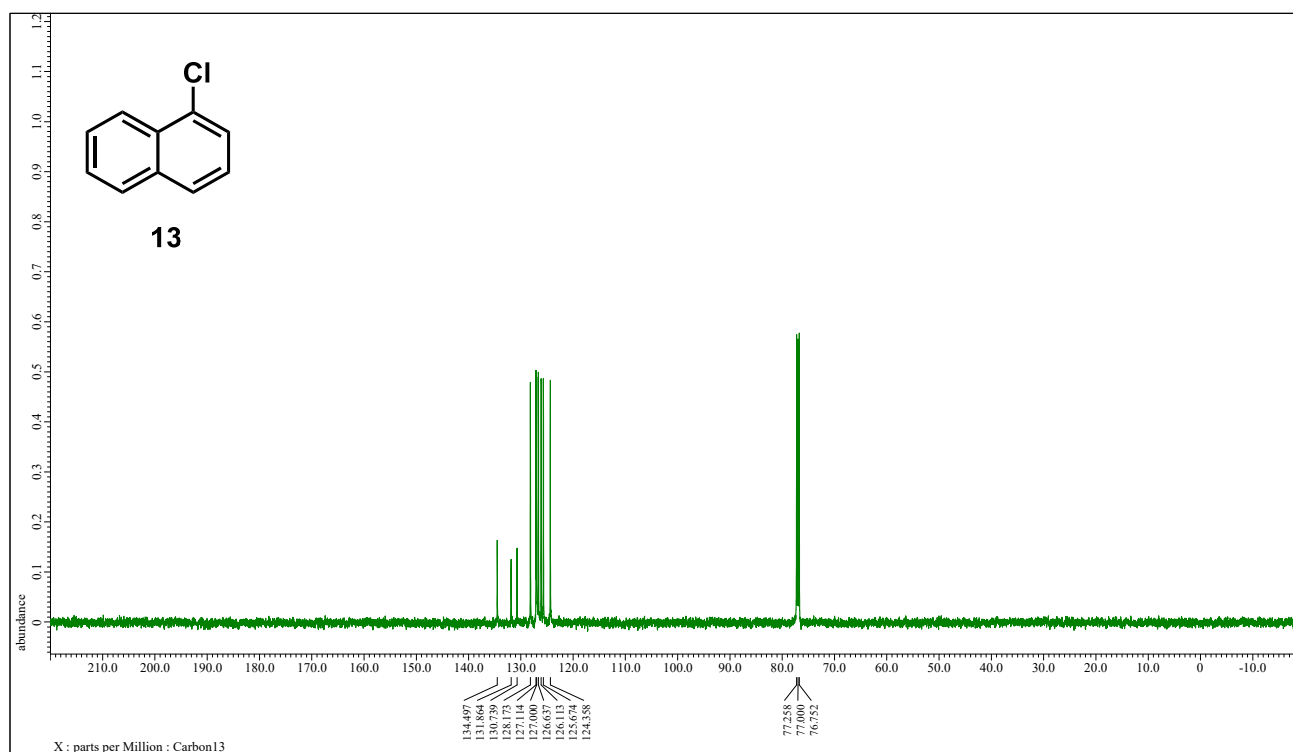

<sup>1</sup>H NMR of 1,2-epoxydodecane (14)

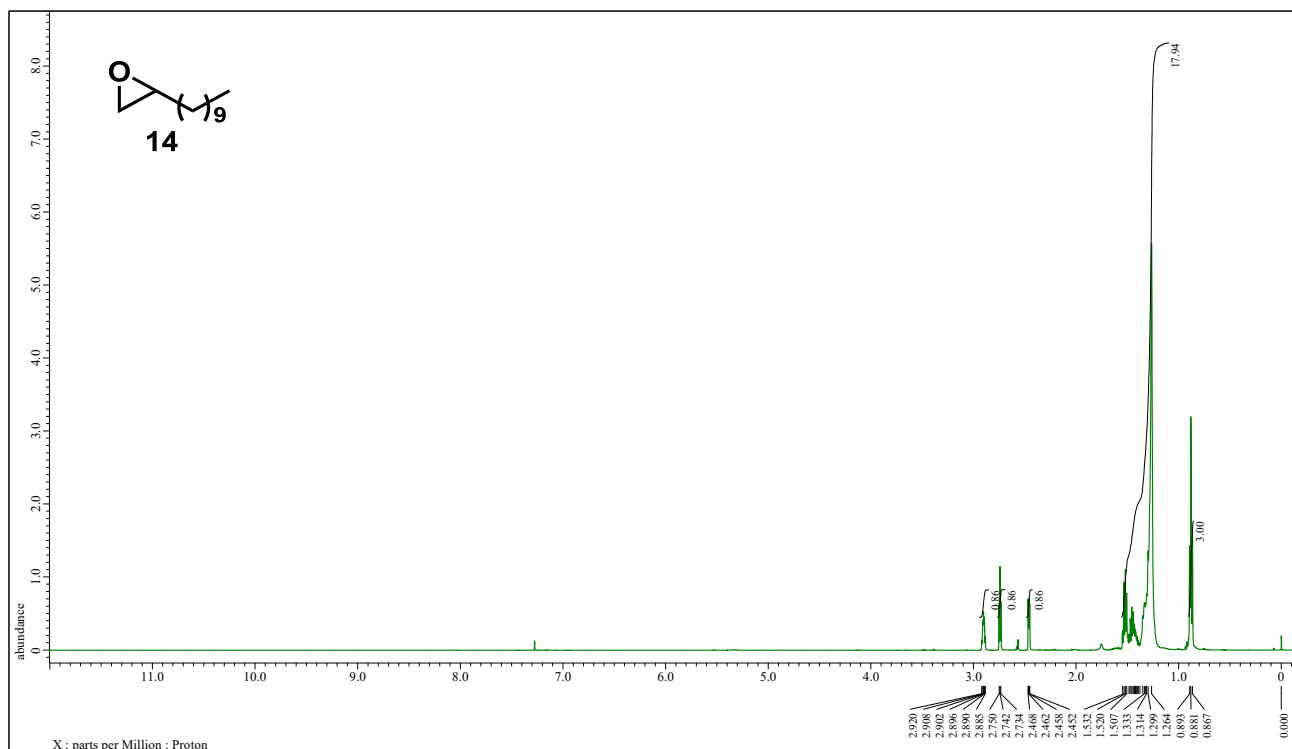

<sup>13</sup>C NMR of 1,2-epoxydodecane (14)

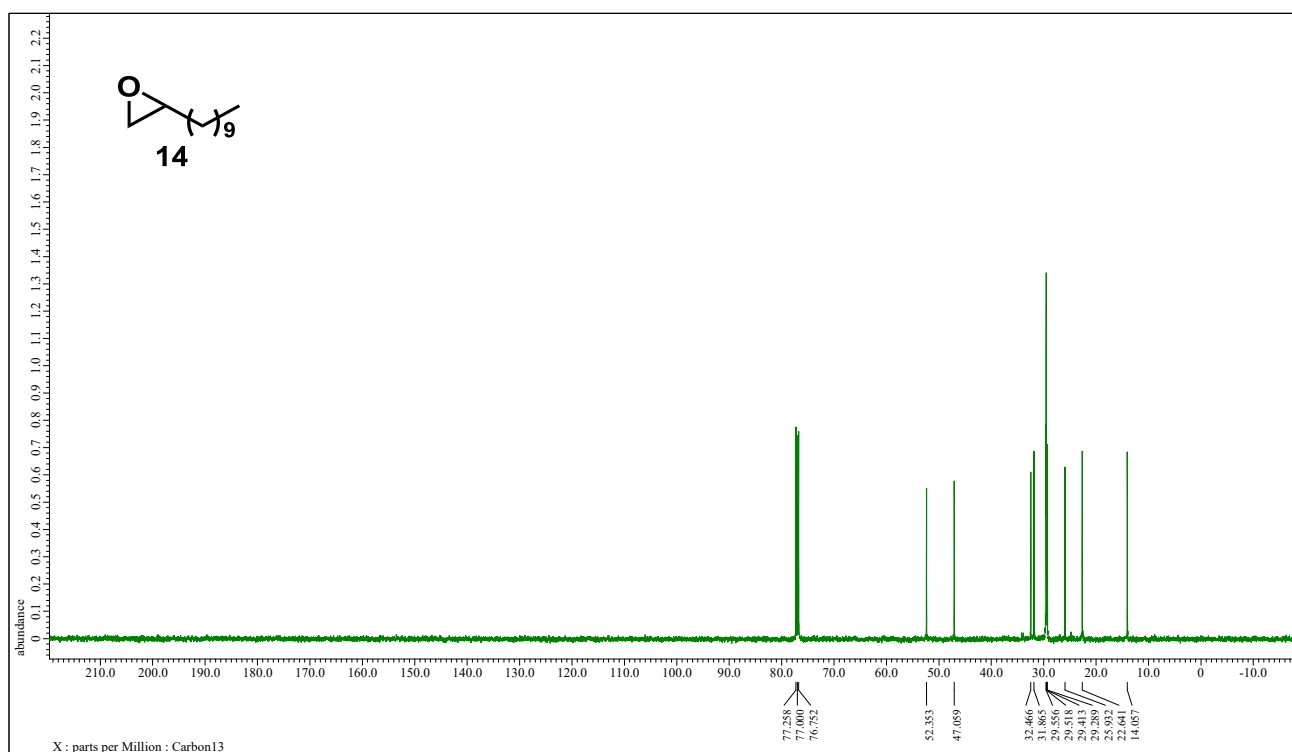

<sup>1</sup>H NMR of 1-(*tert*-butyldimethylsilyl)oxy-3-phenylpropane (16)

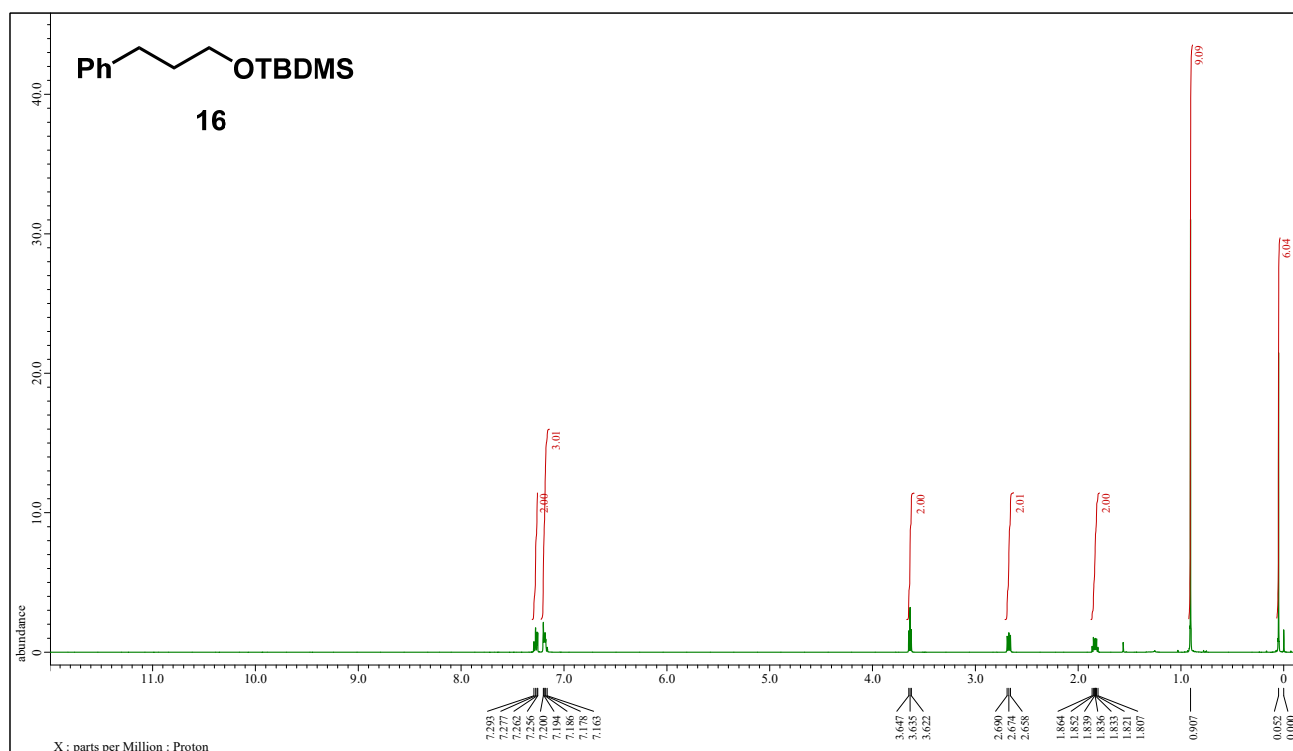

<sup>13</sup>C NMR of 1-(*tert*-butyldimethylsilyl)oxy-3-phenylpropane (16)

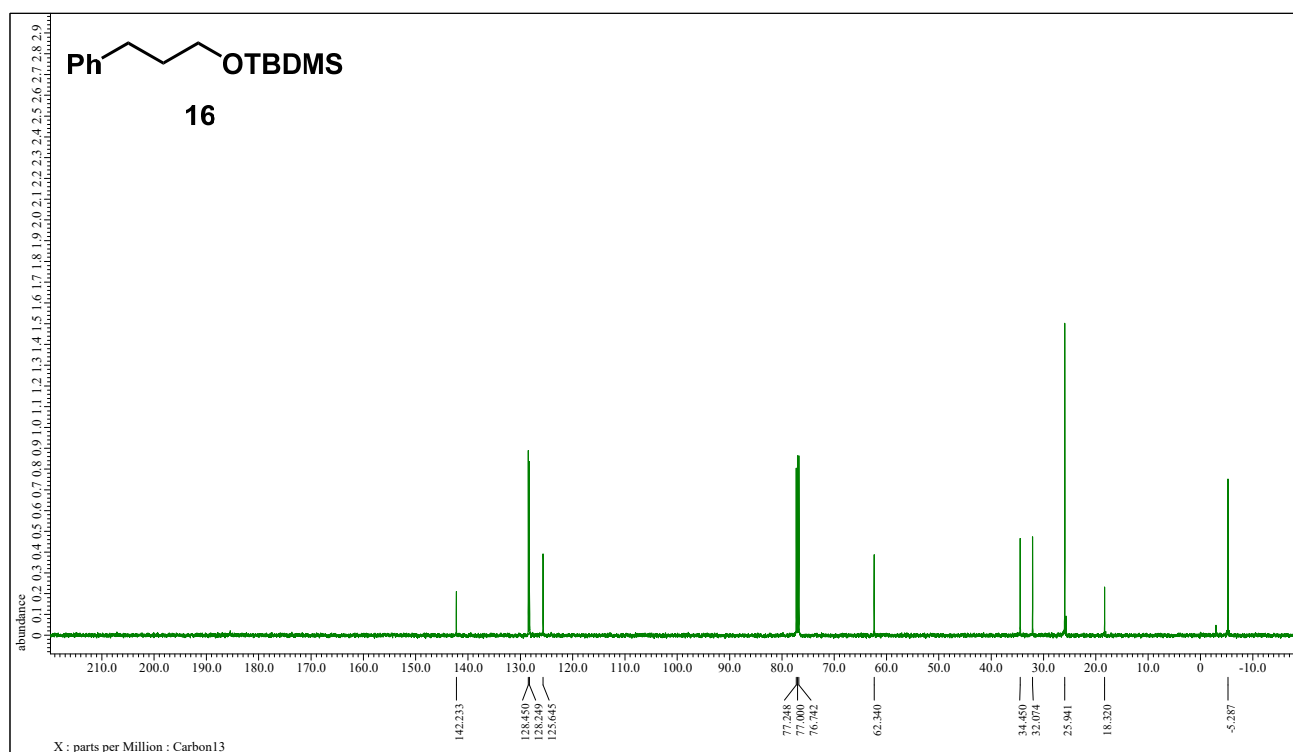

### <sup>1</sup>H NMR of 3-phenyl-1-propanol (18)

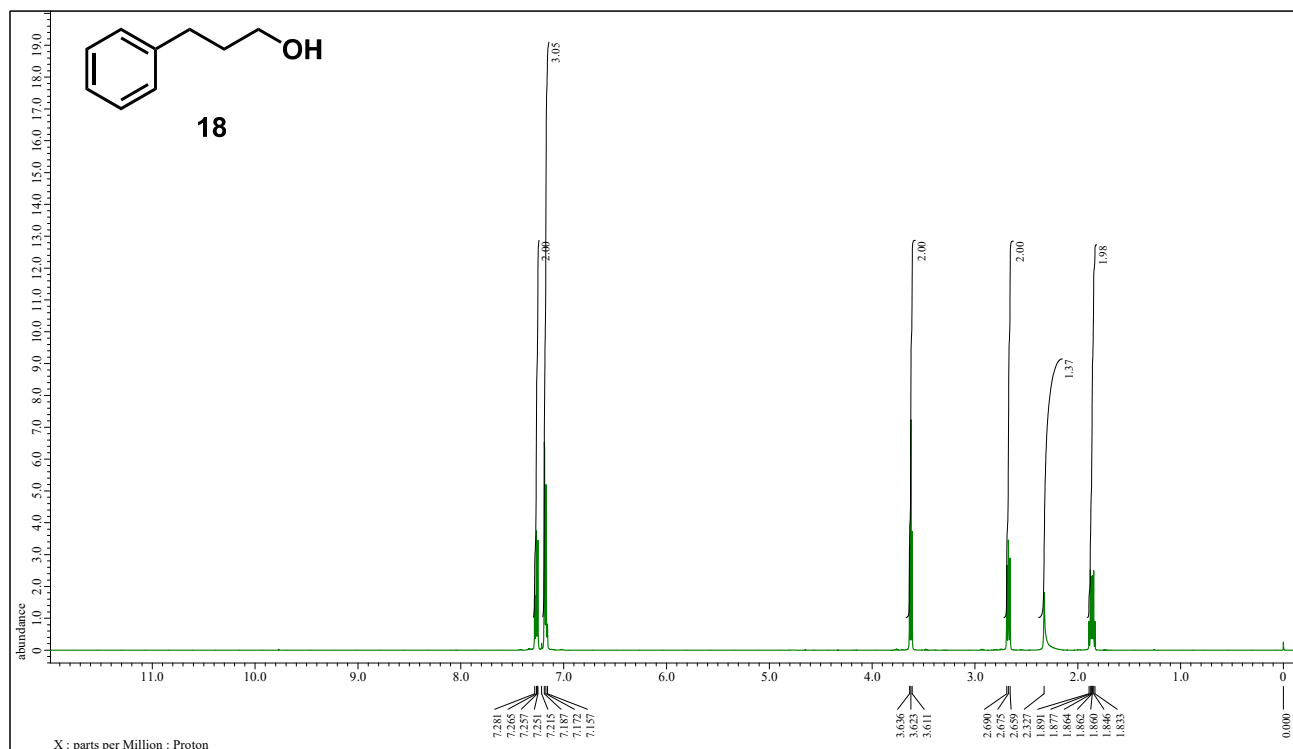

### <sup>13</sup>C NMR of 3-phenyl-1-propanol (18)

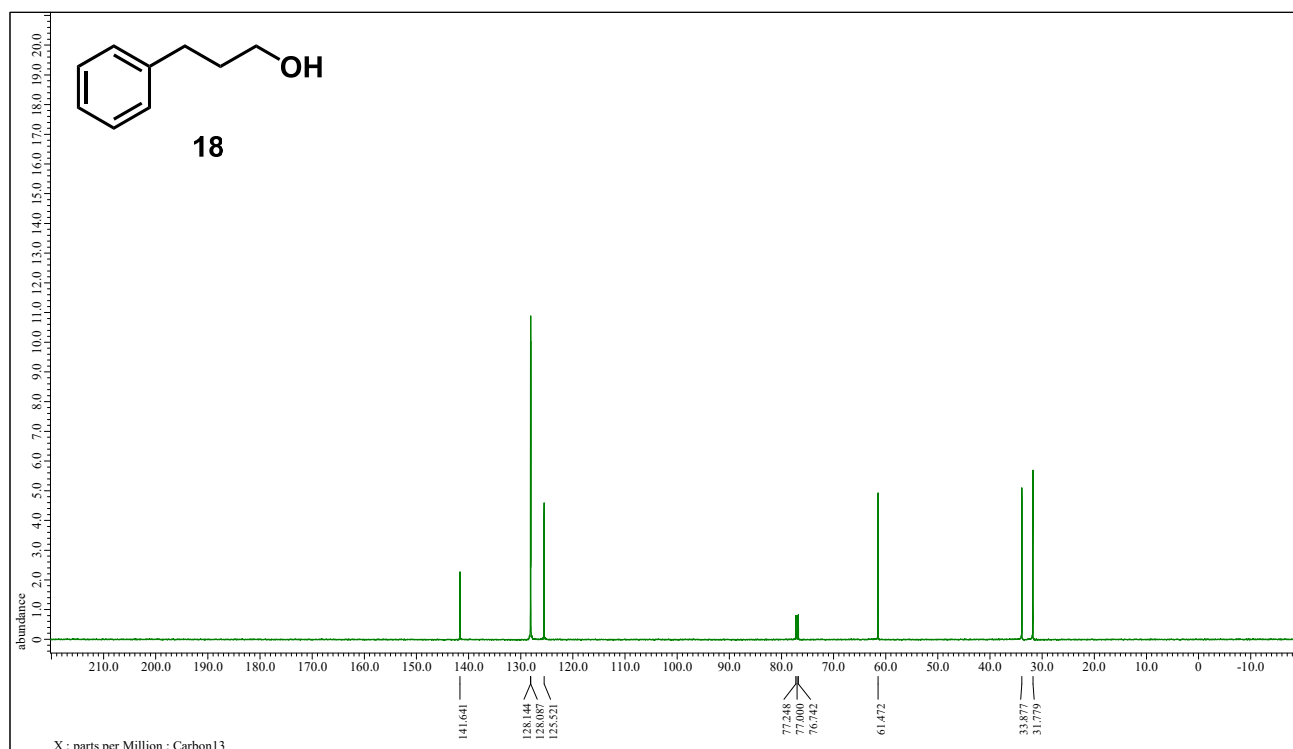

### <sup>1</sup>H NMR of (*Z*)-1,2-diphenylethene (2a)

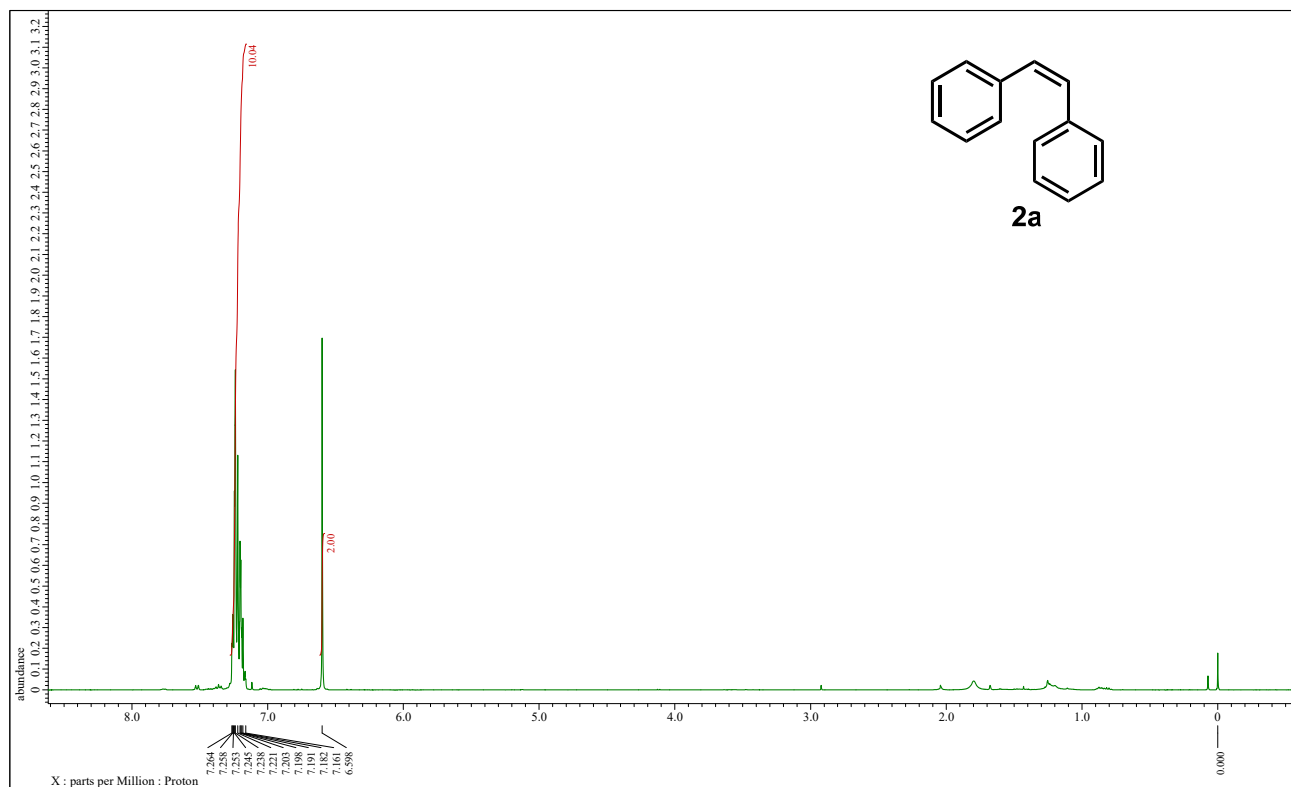

### <sup>13</sup>C NMR of (*Z*)-1,2-diphenylethene (2a)

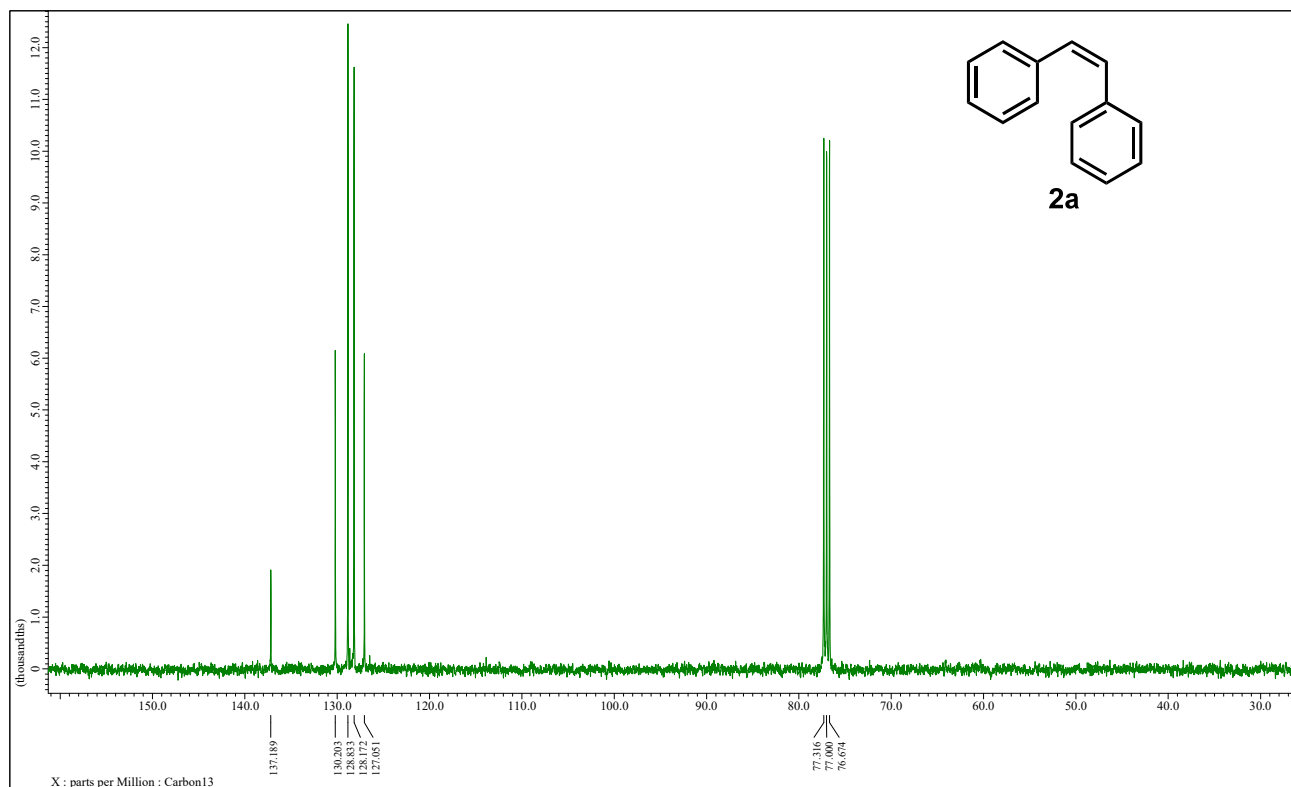

**<sup>1</sup>H NMR of (Z)-1-(hex-1-enyl)-4-methoxybenzene (2b)**

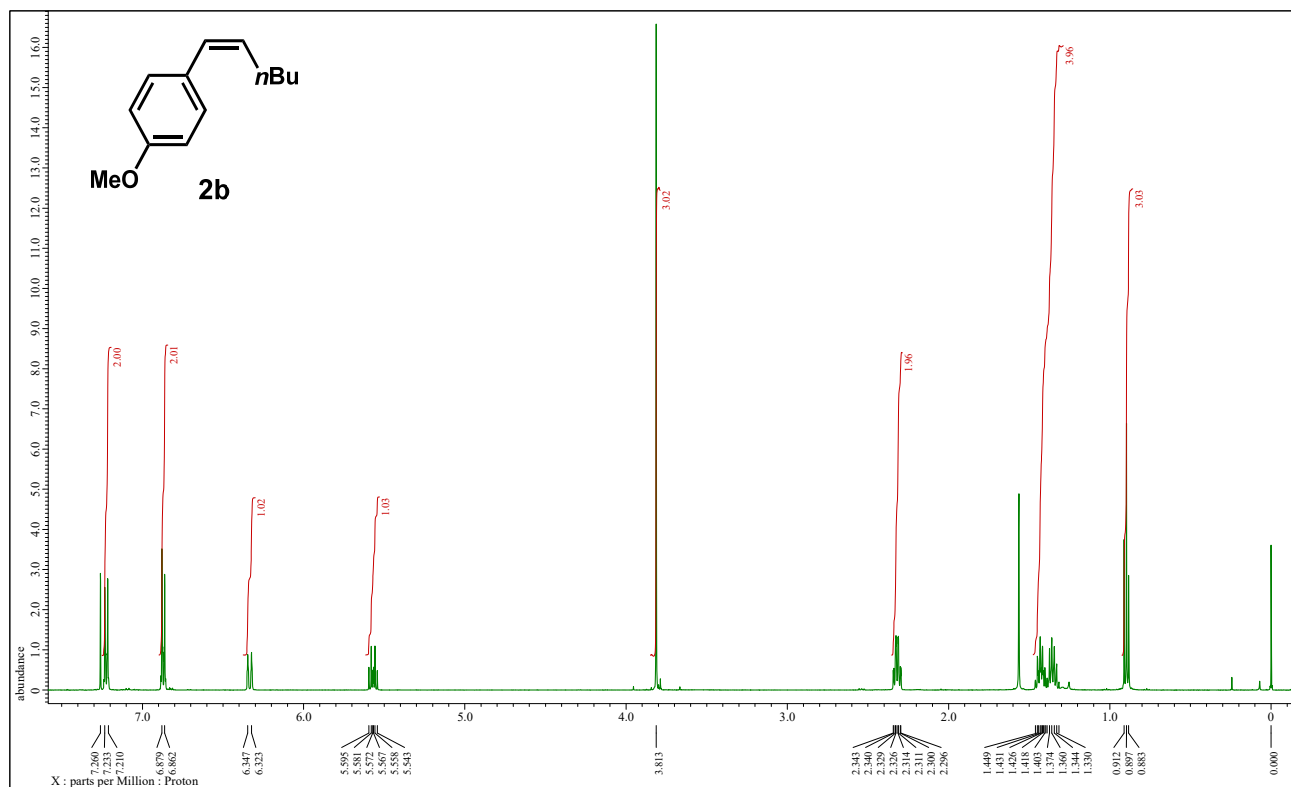

**<sup>13</sup>C NMR of (Z)-1-(hex-1-enyl)-4-methoxybenzene (2b)**

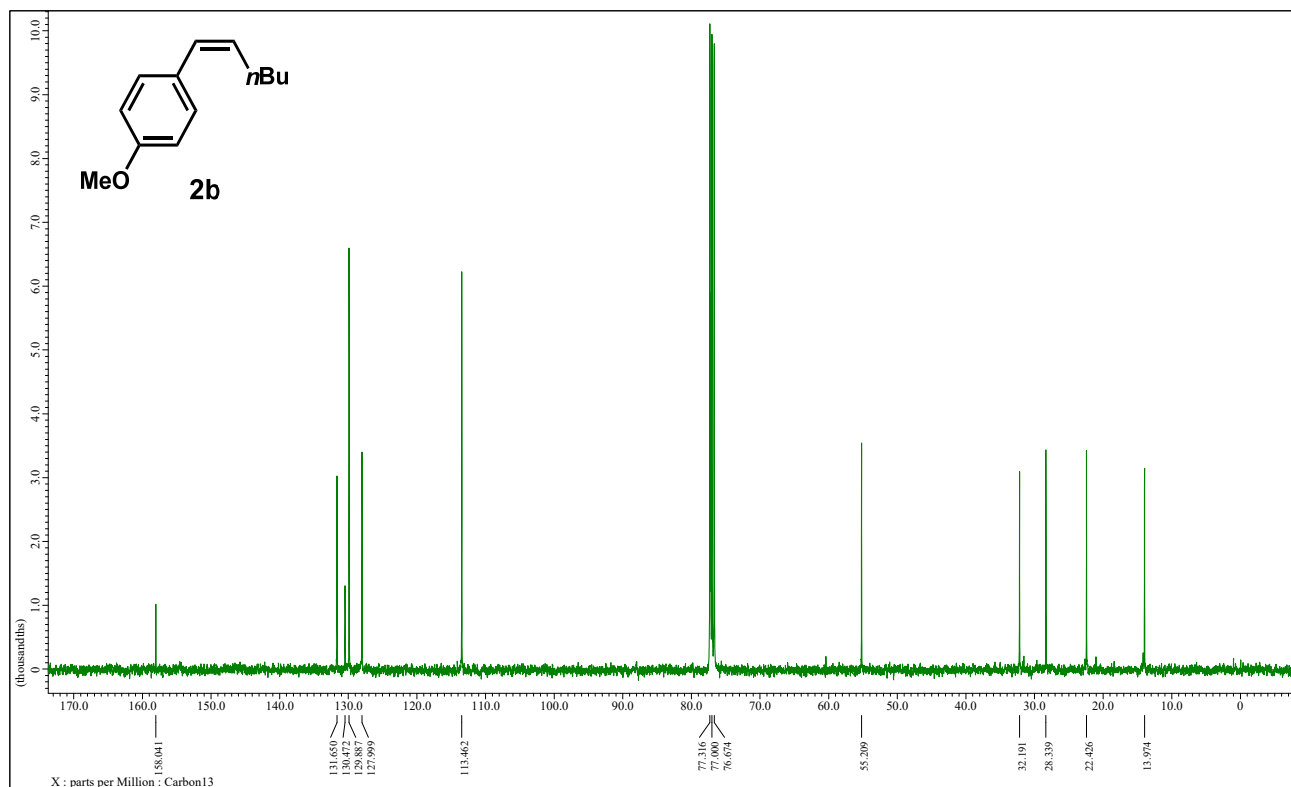



**<sup>1</sup>H NMR of (Z)-2,5-dimethylhex-3-ene-2,5-diol (2c)**

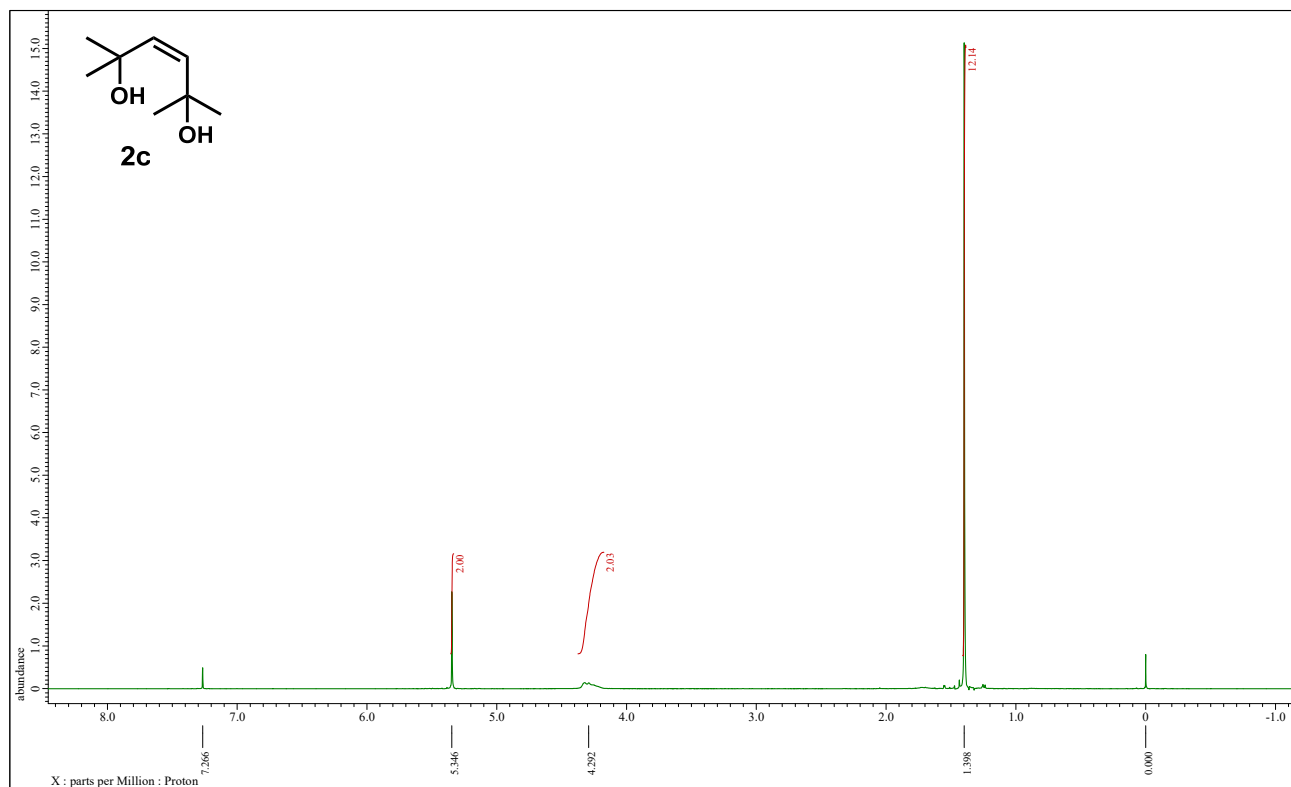

**<sup>13</sup>C NMR of (Z)-2,5-dimethylhex-3-ene-2,5-diol (2c)**

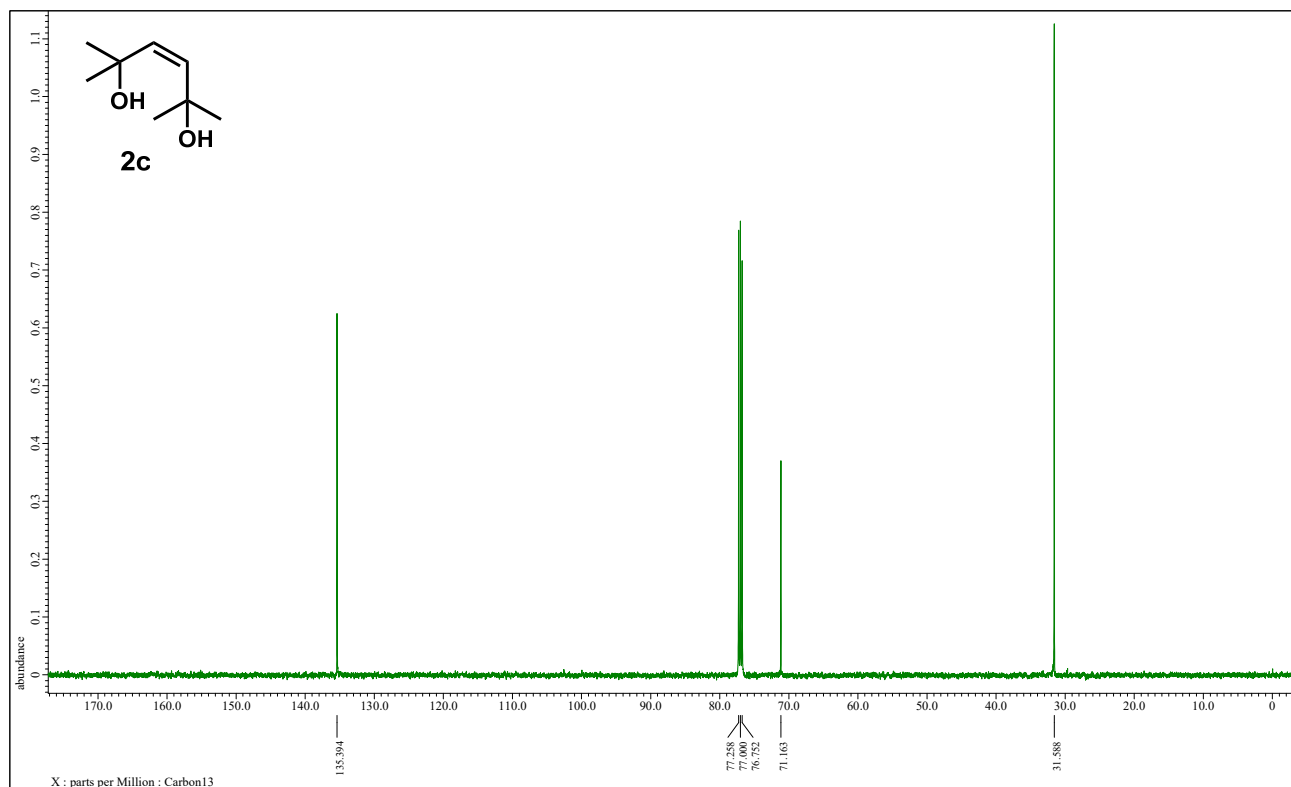

### <sup>1</sup>H NMR of 2-methoxy-6-vinylnaphthalene (2d)

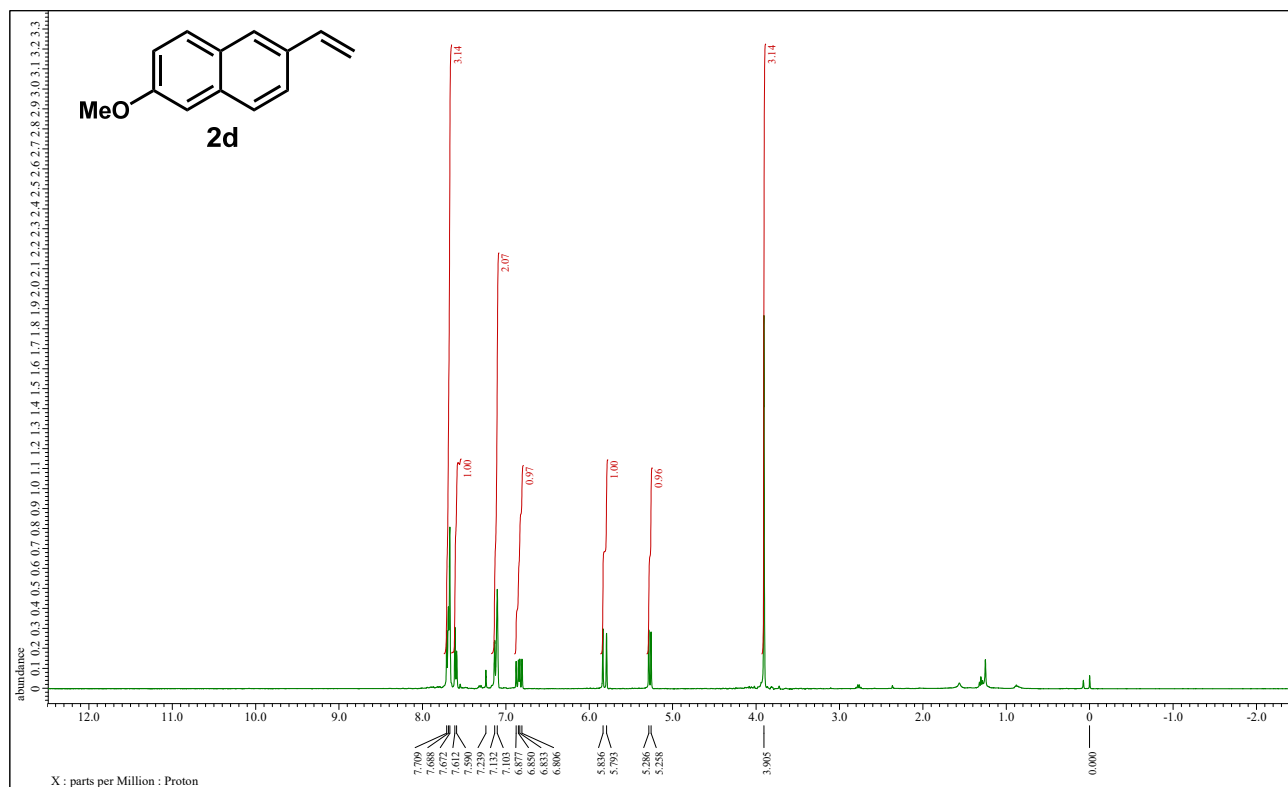

### <sup>13</sup>C NMR of 2-methoxy-6-vinylnaphthalene (2d)

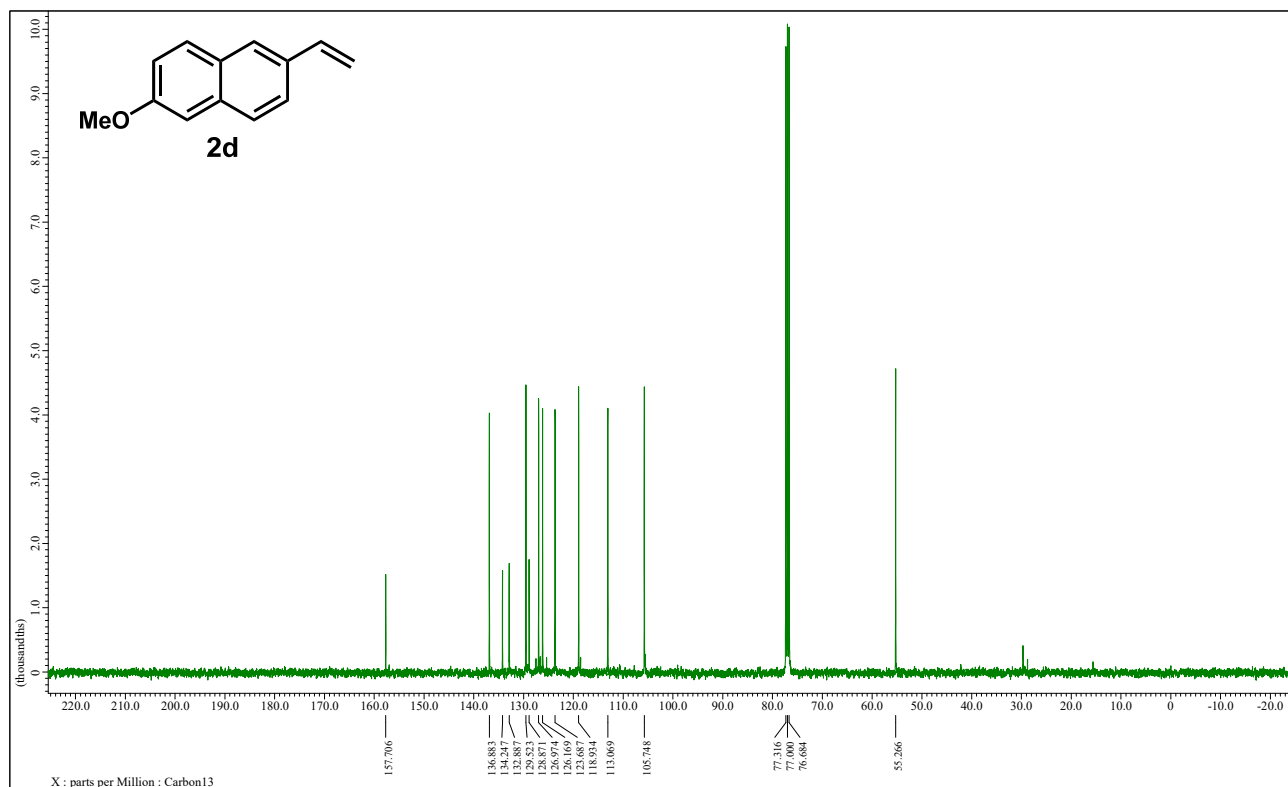

Chemical structure of **2e** is shown in the top left corner. The structure is a benzene ring with a vinyl group ( $-\text{CH}=\text{CH}_2$ ) at position 1 and a CbzHN group ( $-\text{NH}-\text{CO}-\text{CH}_2-\text{CH}_2-\text{Ph}$ ) at position 4.

The  $^1\text{H}$  NMR spectrum (CDCl<sub>3</sub>) shows the following peaks (chemical shift in ppm) and integrations:

- 7.624, 7.486, 7.391, 7.370, 7.357, 7.349 (aromatic/vinyl protons, integration 2.14)
- 6.699, 6.671, 6.655, 6.638 (aromatic protons, integration 2.15)
- 5.692, 5.669, 5.207 (NH protons, integration 1.00)
- 5.197, 5.169 (CH<sub>2</sub> protons, integration 0.88)
- 2.15 (CH<sub>2</sub> protons, integration 2.15)
- 1.00 (CH<sub>2</sub> protons, integration 1.00)
- 0.88 (CH<sub>2</sub> protons, integration 0.88)
- 0.000 (TMS reference)

**2e**

abundance

X : parts per Million : Carbon13

| Chemical Shift (ppm) |
|----------------------|
| 151.15               |
| 137.254              |
| 135.977              |
| 132.997              |
| 128.621              |
| 128.344              |
| 126.914              |
| 118.511              |
| 112.731              |
| 77.248               |
| 77.000               |
| 76.742               |
| 67.061               |

**<sup>1</sup>H NMR of 1-(4-vinylphenyl)ethenone (2f)**

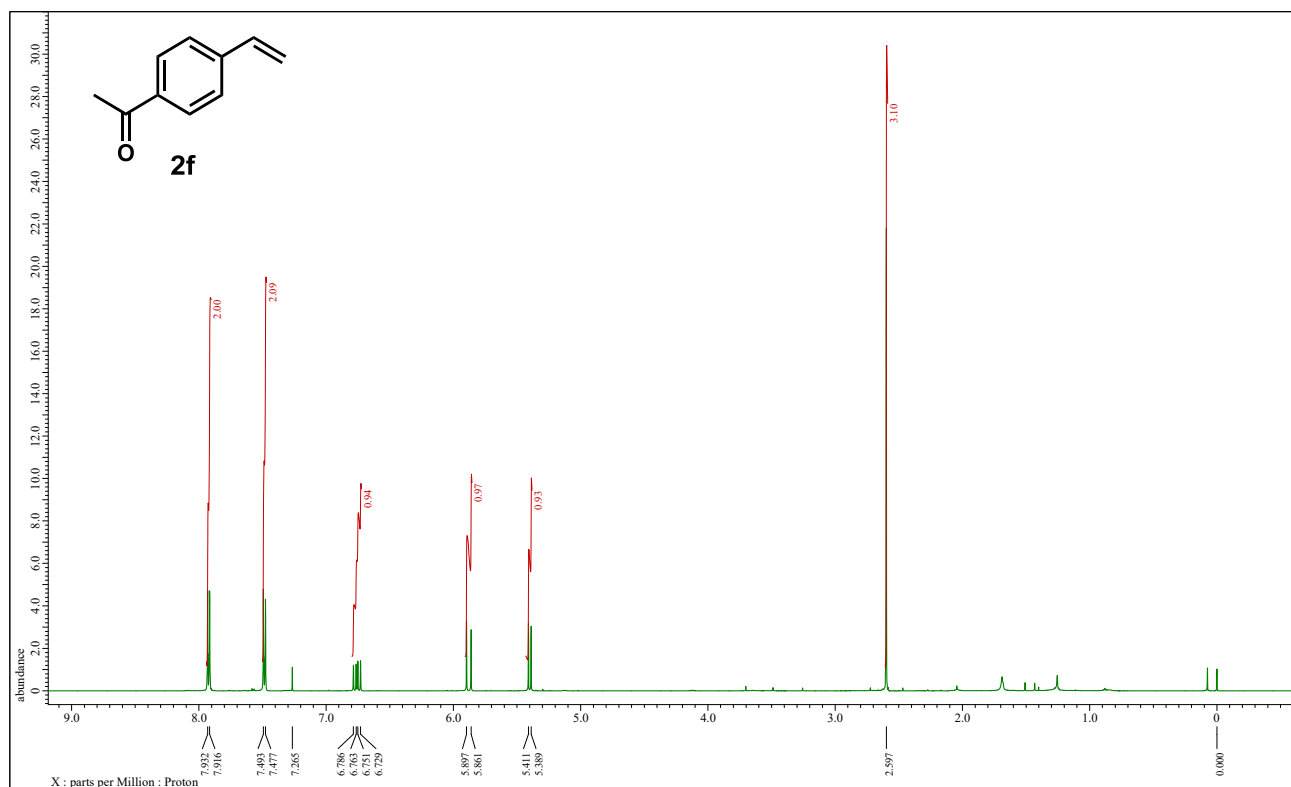

**<sup>13</sup>C NMR of 1-(4-vinylphenyl)ethenone (2f)**

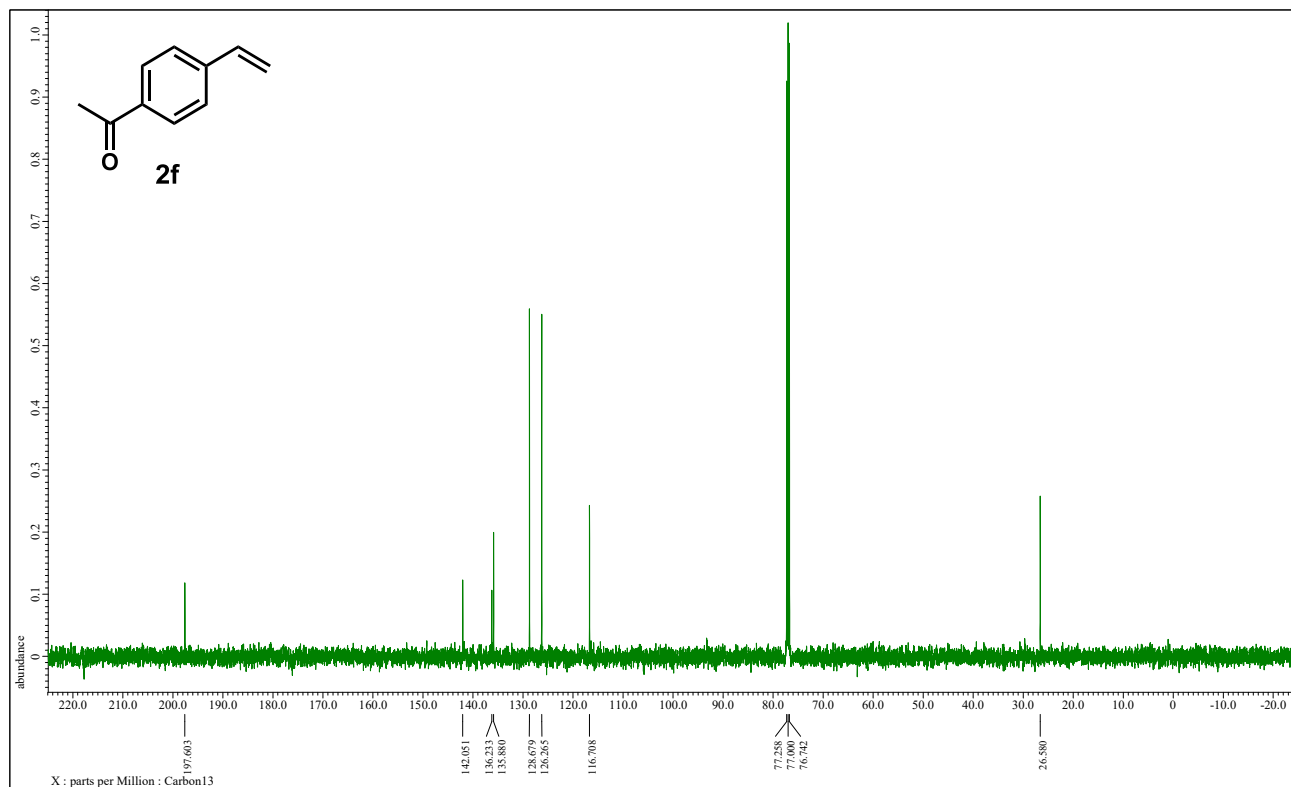

### <sup>1</sup>H NMR of 4-vinylaniline (2g)

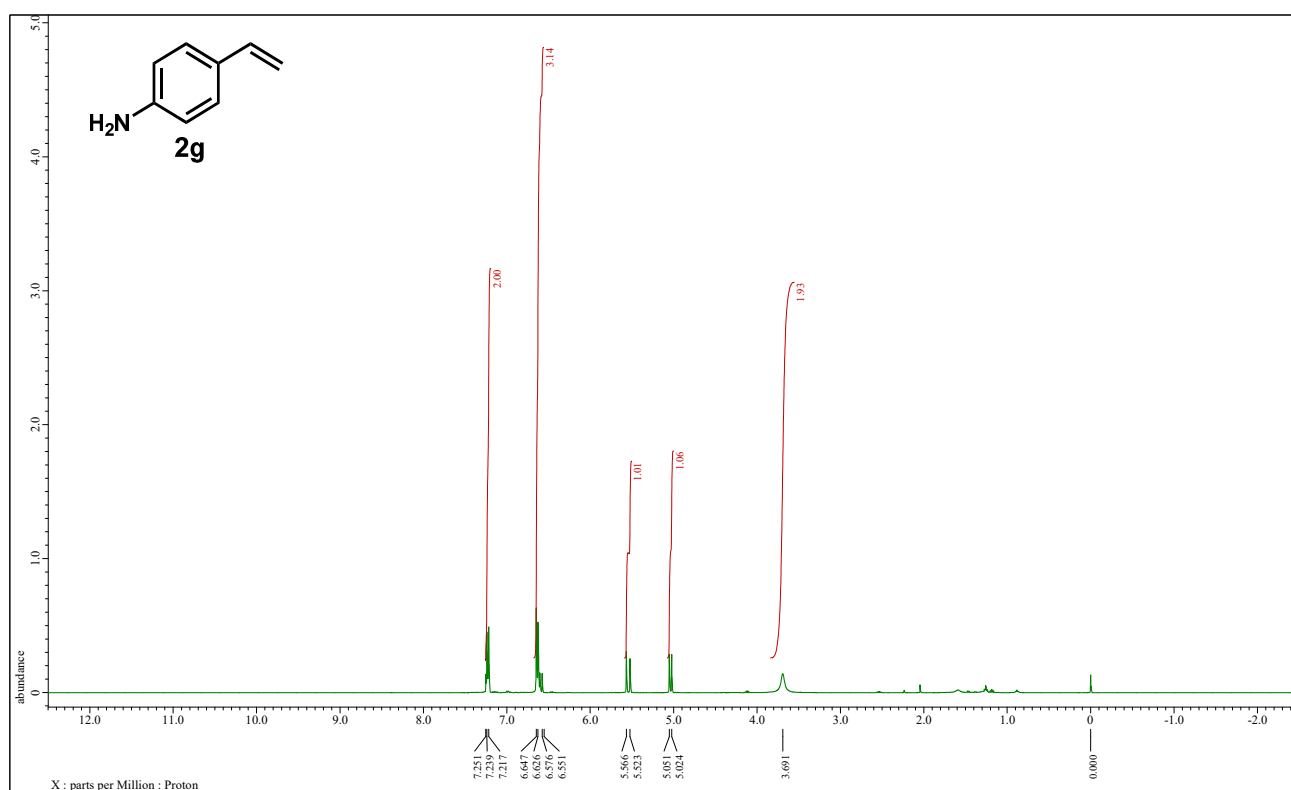

### <sup>13</sup>C NMR of 4-vinylaniline (2g)

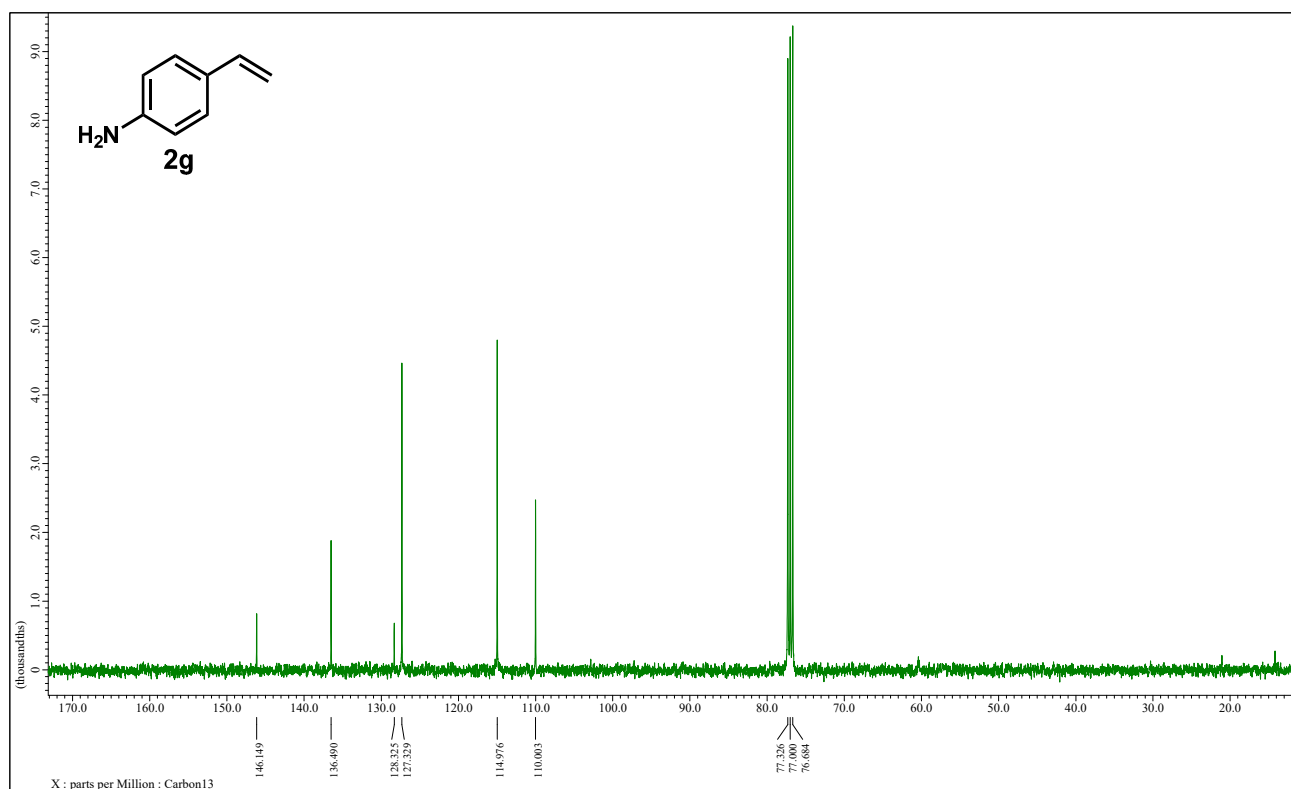

### <sup>1</sup>H NMR of 1-nitro-4-vinylbenzene (2h)

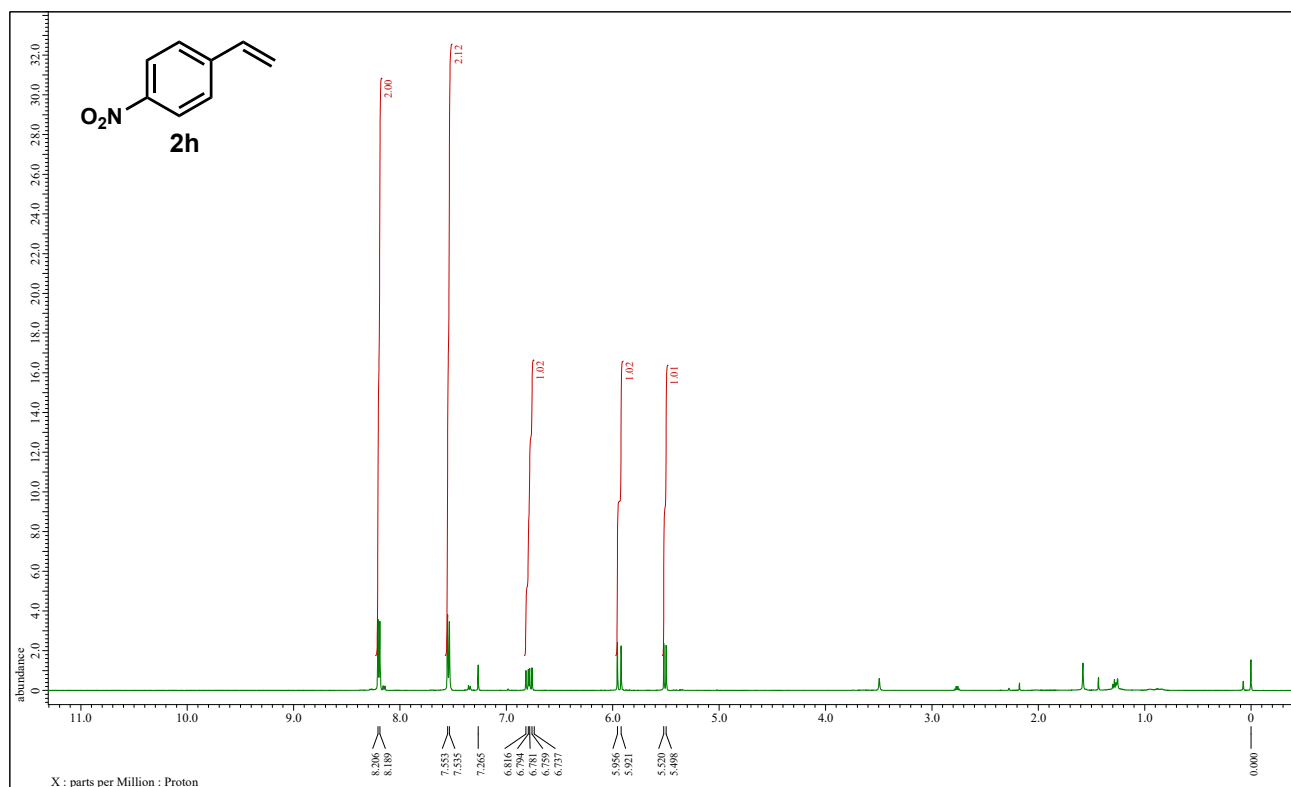

### <sup>13</sup>C NMR of 1-nitro-4-vinylbenzene (2h)

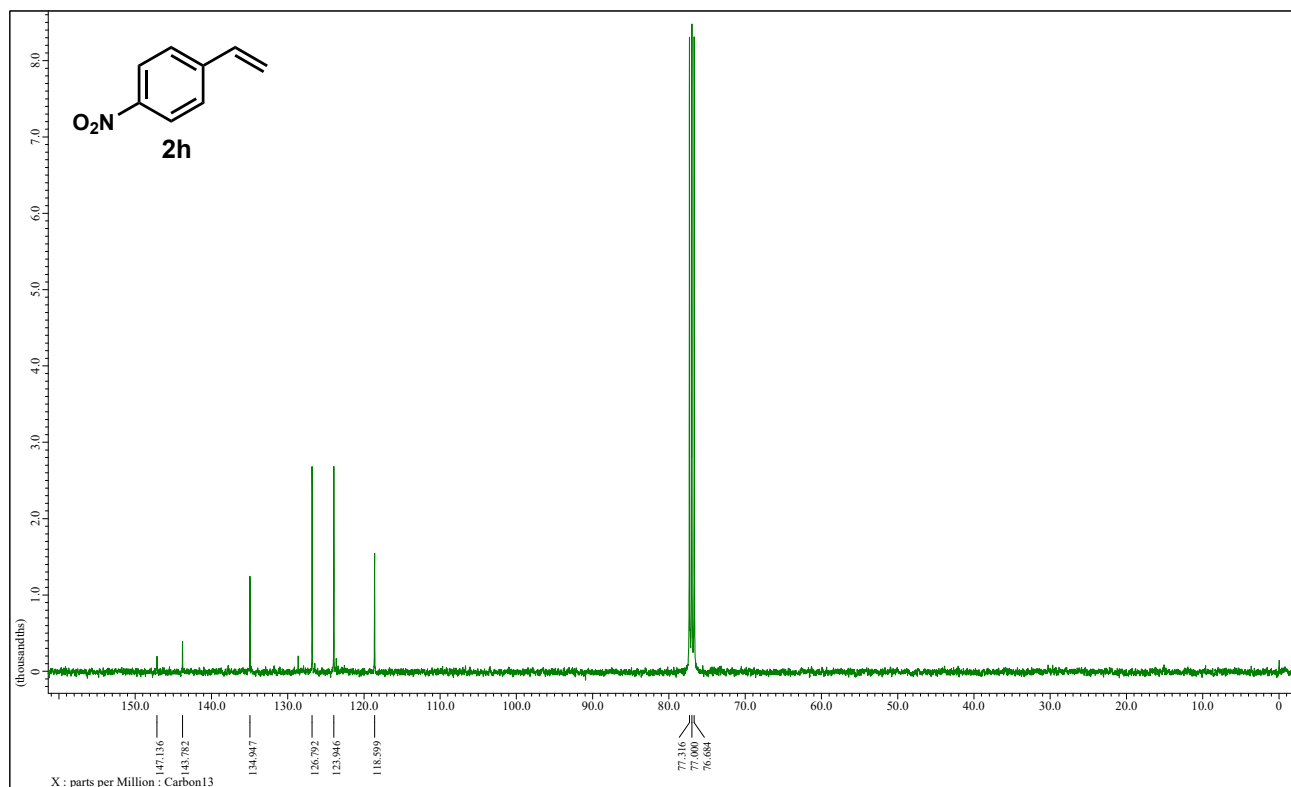

**<sup>1</sup>H NMR of 17 $\alpha$ -vinyl-1,3,5(10)-estratriene-3,17 $\beta$ -diol (2i)**

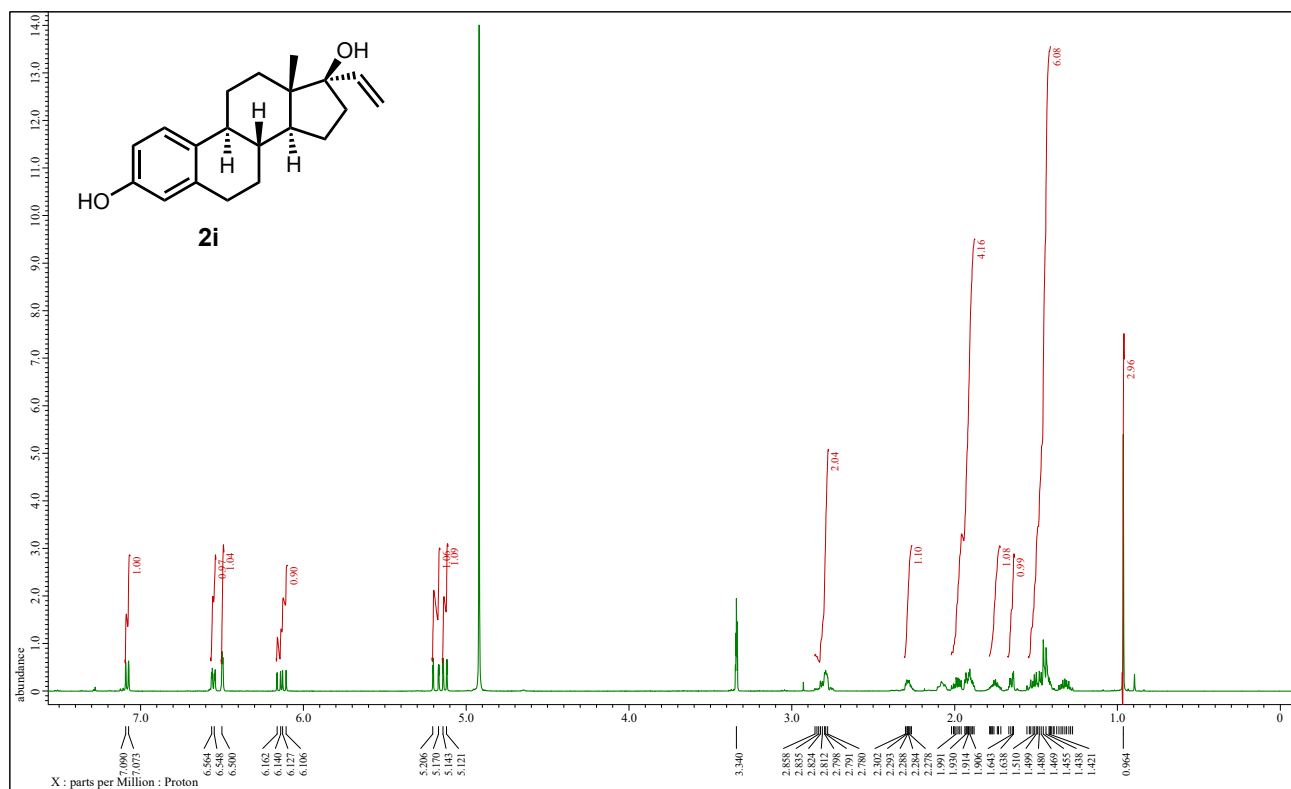

**<sup>13</sup>C NMR of 17 $\alpha$ -vinyl-1,3,5(10)-estratriene-3,17 $\beta$ -diol (2i)**

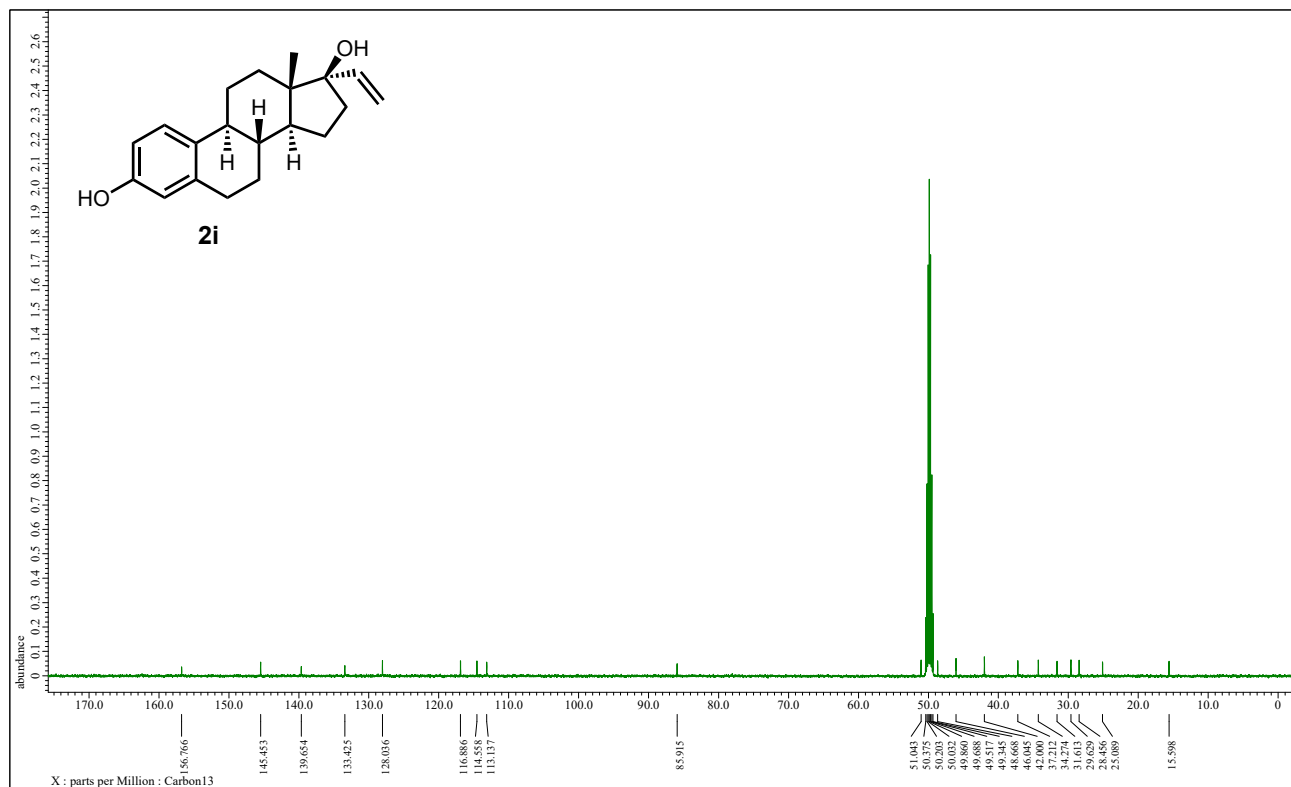

Supplement: s1 [file s1]
